# Supplementary material for: Temporomandibular joint atlas for detection and grading of juvenile idiopathic arthritis involvement by magnetic resonance imaging
Source: PubMed Central journal article supplement (PMC5823950; doi:10.1007/s00247-017-4000-0), 2017-11-13
Supplement: 247_2017_4000_MOESM1_ESM.pdf [file 247_2017_4000_MOESM1_ESM.pdf]

# Identification and Grading of Juvenile Idiopathic Arthritis Related Changes in the Temporomandibular Joints in Contrast Enhanced Magnetic Resonance Imaging:

## An Imaging Atlas

Revised and shortened educational poster (EDU-107), presented at the 60<sup>th</sup> Annual Meeting and Categorical Course of the Society of Pediatric Radiology - Vancouver, BC, Canada on May 18<sup>th</sup>, 2017

(Junhasavasdikul T, Kellenberger CJ, Tolend M, Doria AS (2017) Identification and Grading of Juvenile Idiopathic Arthritis Related Changes in the Temporomandibular Joints in Contrast Enhanced Magnetic Resonance Imaging: An Imaging Atlas. *Pediatr Radiol* 47 (Suppl 1):S111-112. doi:10.1007/s00247-017-3809-x)

[Online Resource 1](#) to pictorial essay

“Temporomandibular Joint Atlas for Detection and Grading of Juvenile Idiopathic Arthritis Involvement by Magnetic Resonance Imaging”, *Pediatric Radiology*

Christian J. Kellenberger, Thitiporn Junhasavasdikul, Mirkamal Tolend, Andrea S. Doria

Corresponding Author:

Christian J. Kellenberger, Department of Diagnostic Imaging, University Children's Hospital Zürich,  
christian.kellenberger@kispi.uzh.ch

# Components of Temporomandibular Joint (TMJ)

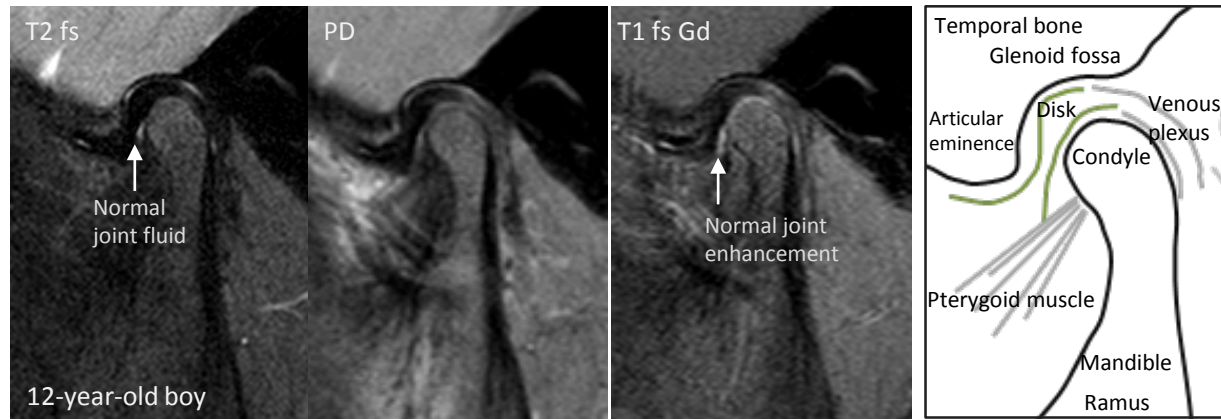

## Synovial fluid or joint effusion

Isointense signal compared to cerebrospinal fluid (CSF) on fluid sensitive-images. Small amount of fluid can be seen in normal TMJs.

## Synovium

Intermediate signal structure on fluid-sensitive images. Normal synovial lining is not perceptible.

## Articular disk

Hypointense intraarticular biconcave structure in all sequences sitting between the head of mandibular condyle and the glenoid fossa of the temporal bone.

## Joint enhancement

A normal TMJ can minimally enhance along the joint space, without any evidence of abnormal widening of the joint space and present with signal intensity higher than adjacent musculature and iso- or hypointense to vessels.

# Age-Related Changes in Osseous Configuration and Bone Marrow Composition

Shape and contour of mandibular condyle show increased anterior tilt and changes from rounded to oval contour over time

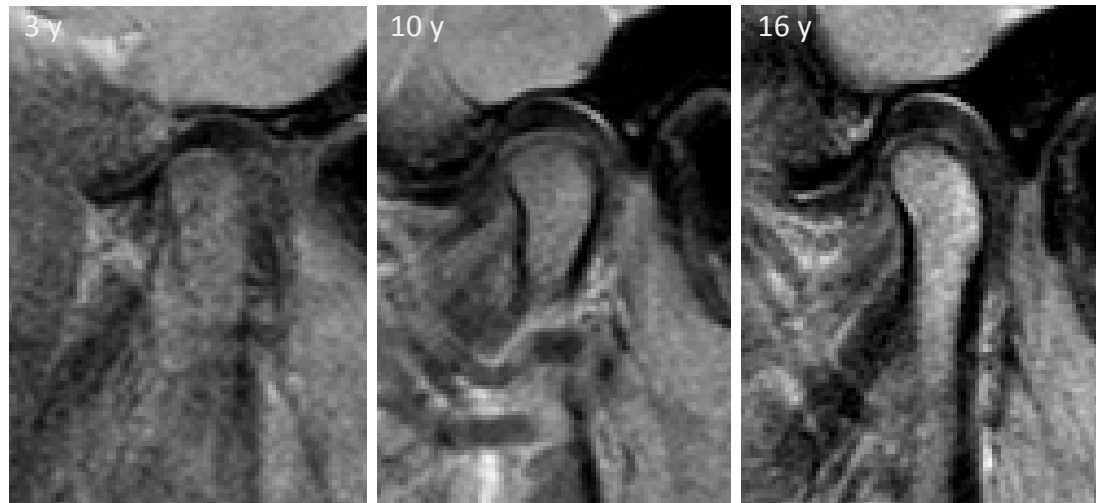

Sagittal-oblique PD-weighted images show configuration of mandibular condyle (left to right): rounded head without a tilt, intermediate appearance and oval head with an anterior tilt

Marrow conversion is expected, changing from hematopoietic to fatty marrow

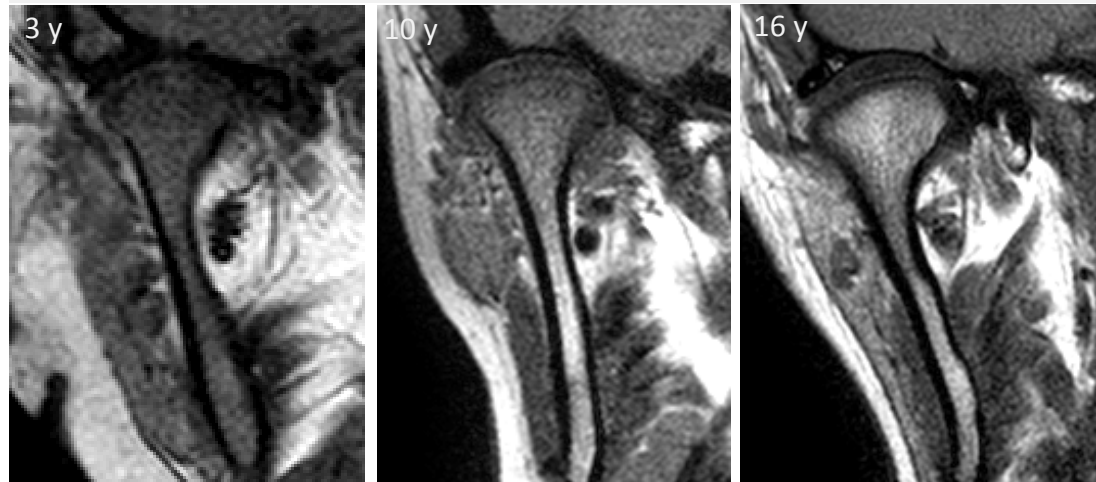

Coronal T1-weighted images show bone marrow type (left to right): hematopoietic marrow, mixed and fatty marrow types

# TMJ MRI Scoring System According to OMERACT JIA Group

- Assessment of 2 domains:

## Inflammatory domain

- Semi-quantitative assessment of bone marrow oedema and enhancement
- Semi-quantitative assessment of joint effusion, joint enhancement and synovial thickening

## Damage domain

- Semi-quantitative assessment of condylar flattening, bone erosions and disk abnormalities

| A) Inflammatory Domain |                                                                                                                                                                                   |                                                                                                                    |                                                                                                                       |                                                                                                                                                              |                                                                                            |                                                                                                                                            |
|------------------------|-----------------------------------------------------------------------------------------------------------------------------------------------------------------------------------|--------------------------------------------------------------------------------------------------------------------|-----------------------------------------------------------------------------------------------------------------------|--------------------------------------------------------------------------------------------------------------------------------------------------------------|--------------------------------------------------------------------------------------------|--------------------------------------------------------------------------------------------------------------------------------------------|
| Bone Marrow Oedema     |                                                                                                                                                                                   | Bone Marrow Enhancement                                                                                            | Joint Effusion                                                                                                        | Synovial Thickening                                                                                                                                          | Joint Enhancement                                                                          |                                                                                                                                            |
| Definition             | Compared to the mandibular ramus, hyperintense marrow signalling within the condyle on T2w fs or STIR images, and/or hypointense signalling on pre-contrast T1w images without fs |                                                                                                                    | Compared to the mandibular ramus, hyperintense marrow signalling within the condyle on post-contrast T1w fs images    | Increased joint fluid with isointense signalling of joint space compared to that of cerebrospinal fluid on T2w fs or STIR images                             | Thickened synovial lining of the joint compartments with intermediate signal on T2w images | Signal intensity of the synovium, capsule, and joint fluid higher than that of muscle on post-contrast T1w fs images                       |
| Grading                | 0                                                                                                                                                                                 | Absent                                                                                                             | Absent                                                                                                                | Absent: $\leq 1$ mm fluid in joint recess                                                                                                                    | Absent: No synovium visible (joint space $\leq 1$ mm width)                                | Normal: High signal intensity confined to signal perimeter of normal amount of fluid on corresponding fluid-sensitive image                |
|                        | 1                                                                                                                                                                                 | Present                                                                                                            | Present                                                                                                               | Small: $>1$ and $\leq 2$ mm fluid in recess or involving entire joint compartment                                                                            | Mild: $>1$ and $\leq 2$ mm thickness at the point of maximum synovial thickening           | Mild: High signal intensity focally exceeding signal perimeter of physiologic amount of joint fluid on corresponding fluid-sensitive image |
|                        | 2                                                                                                                                                                                 |                                                                                                                    |                                                                                                                       | Large: $>2$ mm fluid in recess or involving entire joint compartment                                                                                         | Moderate/Severe: $>2$ mm thickness at the point of maximum synovial thickening             | Moderate/Severe: High signal intensity diffusely involving one or both joint compartments                                                  |
| B) Damage Domain       |                                                                                                                                                                                   |                                                                                                                    |                                                                                                                       |                                                                                                                                                              |                                                                                            |                                                                                                                                            |
| Condylar Flattening    |                                                                                                                                                                                   | Erosions                                                                                                           | Disk Abnormalities                                                                                                    |                                                                                                                                                              |                                                                                            |                                                                                                                                            |
| Definition             | Loss of the round or slightly angular shape of the condylar head, viewed in the sagittal-oblique plane                                                                            |                                                                                                                    | Any irregularity or break of the bony joint surfaces leading to the loss of the smooth continuous outline of the bone | Any abnormality of the articular disk, including flattening, displacement or destruction                                                                     |                                                                                            |                                                                                                                                            |
| Grading                | 0                                                                                                                                                                                 | Absent: Round/slightly angular shape                                                                               |                                                                                                                       | Absent: No irregularities or deep breaks                                                                                                                     |                                                                                            |                                                                                                                                            |
|                        | 1                                                                                                                                                                                 | Mild: Extent of flattening involves part of the surface of the condyle                                             |                                                                                                                       | Mild: Presence of irregularities involving only part of the articular surface of the condyle                                                                 |                                                                                            |                                                                                                                                            |
|                        | 2                                                                                                                                                                                 | Moderate/Severe: Extent of flattening involves the entire surface of the condyle, or loss of height of the condyle |                                                                                                                       | Moderate/Severe: Presence of deep breaks in the subchondral bone seen in two planes, or irregularities involving the entire articular surface of the condyle |                                                                                            |                                                                                                                                            |

T2w T2-weighted; fs fat saturated; STIR short tau inversion recovery; T1w T1-weighted

# Inflammatory Domain

## Bone Marrow Oedema

|            |                                                                                                                                                                                                        |
|------------|--------------------------------------------------------------------------------------------------------------------------------------------------------------------------------------------------------|
| Definition | Compared to the mandibular ramus, hyperintense marrow signalling within the condyle on fluid-sensitive images, and/or hypointense signalling on pre-contrast T1-weighted images without fat saturation |
| Grading    | Absent                                                                                                                                                                                                 |
|            | Present                                                                                                                                                                                                |
|            |                                                                                                                                                                                                        |

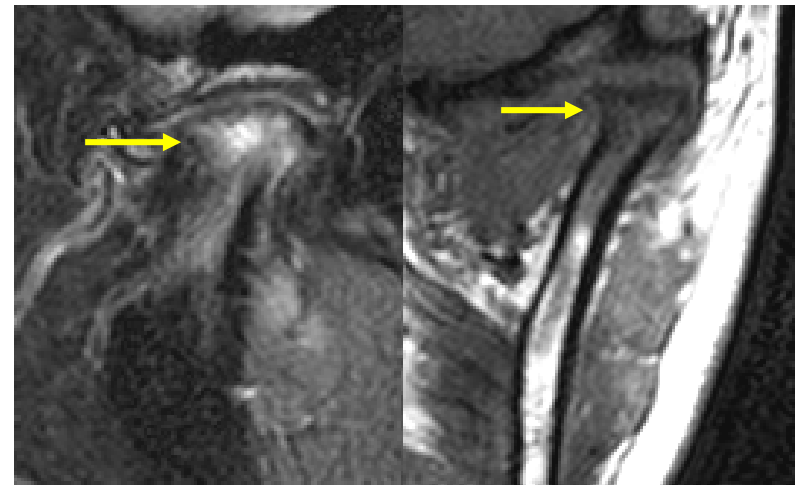

Hyperintense compared to ramus on T2-weighted fat saturated image

Hypointense on pre-contrast T1-weighted image

Age 0-6 years old

Absent

Sag-obl T2 fs

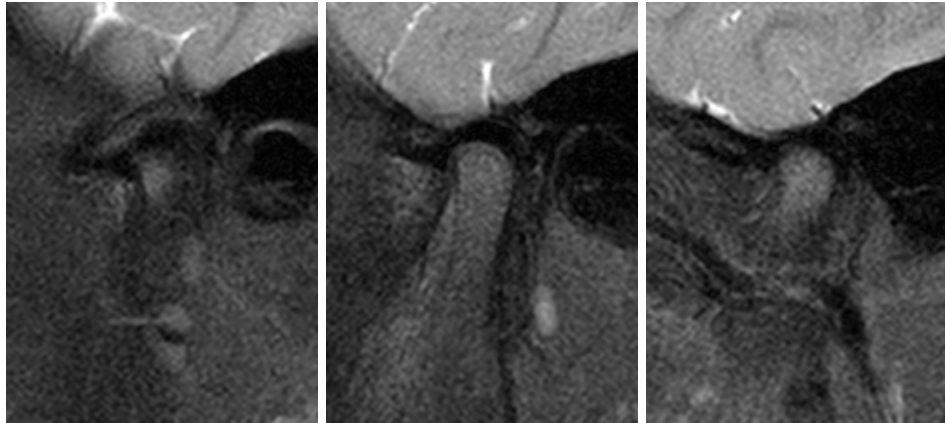

A 3-year-old boy with an unremarkable TMJ

Cor T1

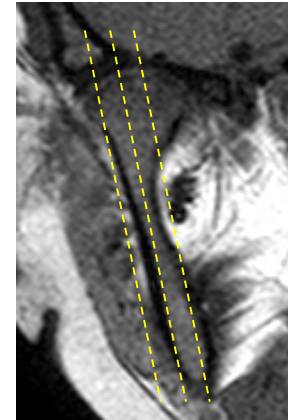

Sag-obl T2 fs

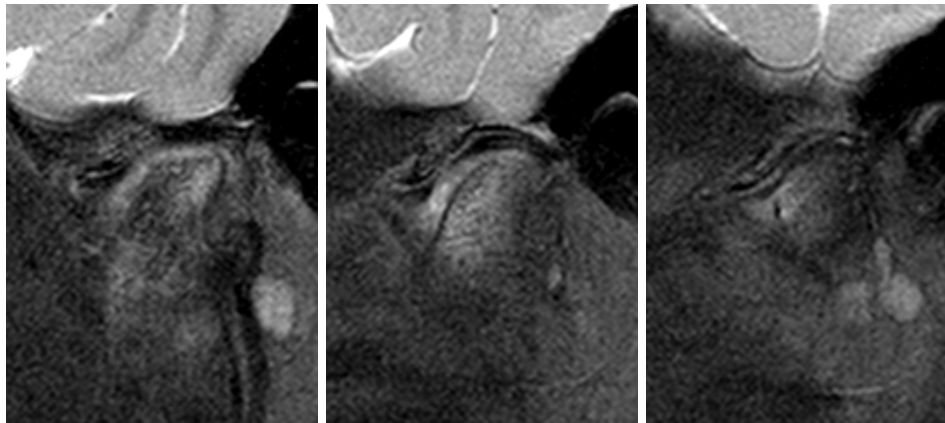

Present

Left TMJ of a 4-year-old boy with a known history of JIA

Cor T1

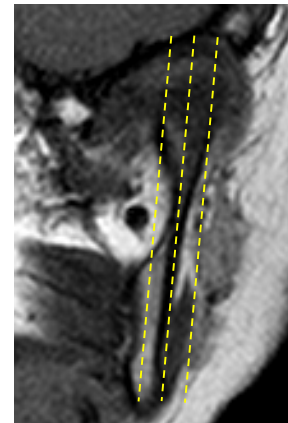

Age 7-13 years old

Absent

Sag-obl T2 fs

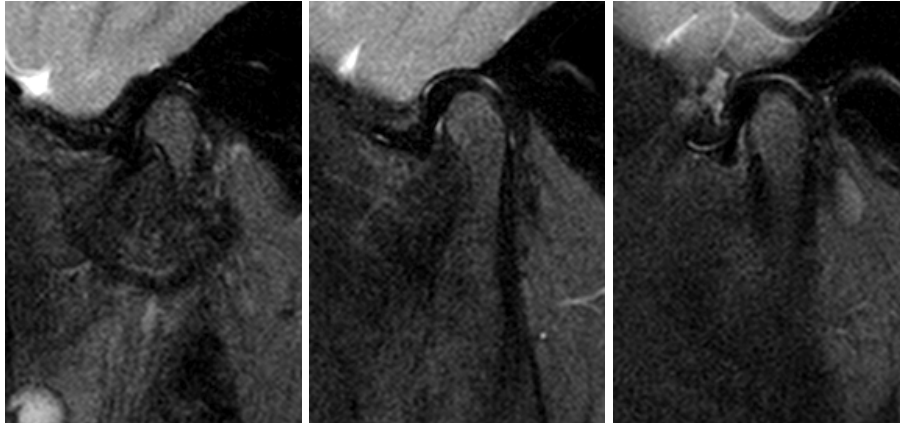

A 12-year-old boy with an unremarkable TMJ

Cor T1

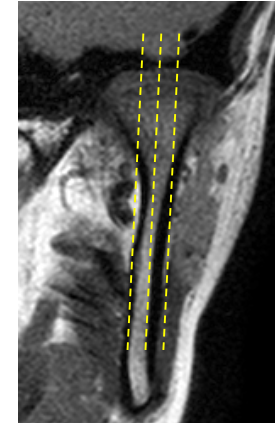

Sag-obl T2 fs

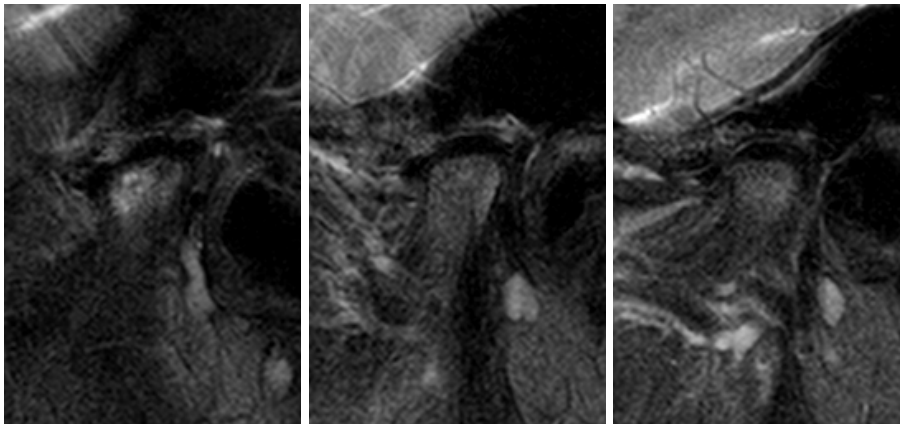

Present

Right TMJ of a 13-year-old girl with a known history of JIA

Cor T1

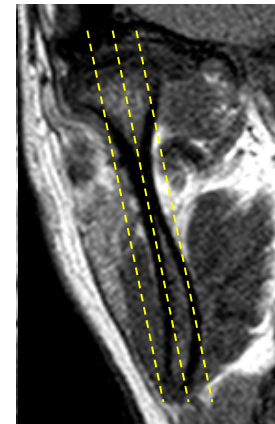



Age 14-18 years old

Absent

Sag-obl T2 fs

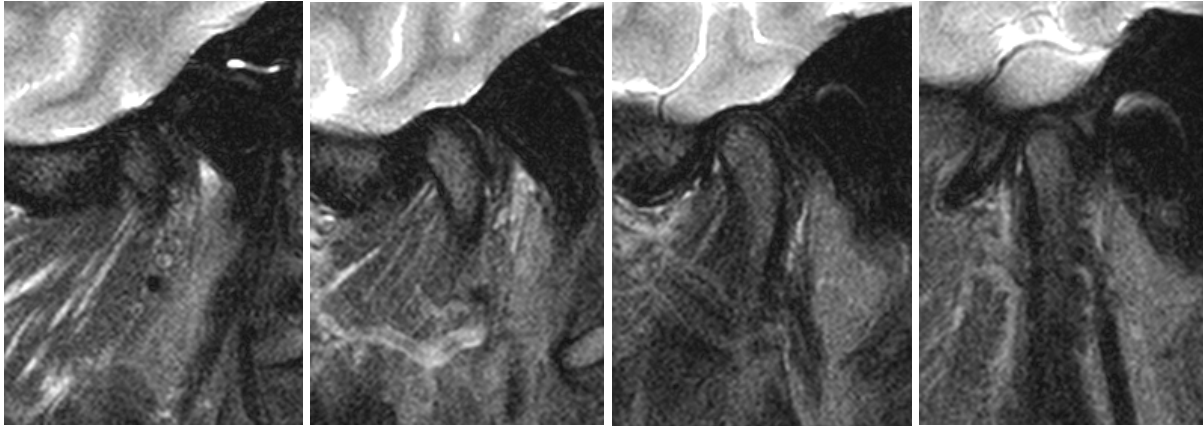

Cor T1

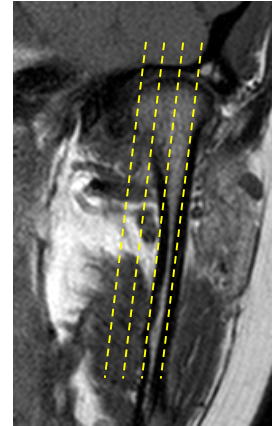

TMJ of a 17-year-old girl with an unremarkable TMJ

Present

Sag-obl T2 fs

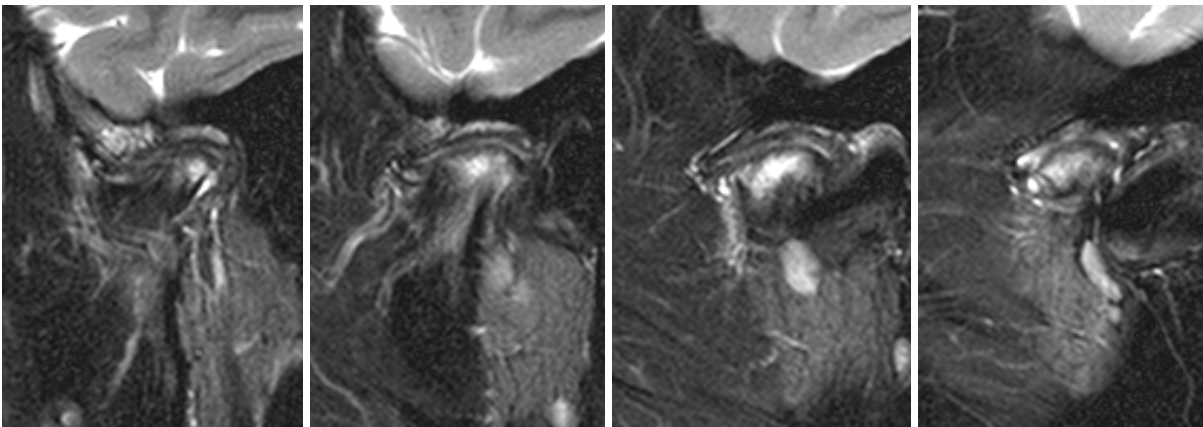

Cor T1

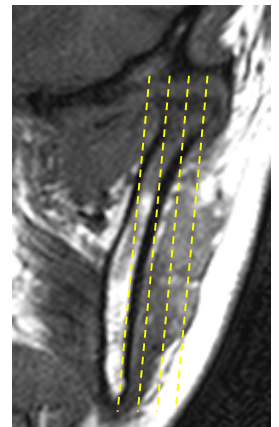

Left TMJ of a 17-year-old girl with a known history of JIA

# Inflammatory Domain

## Bone Marrow Enhancement

|            |                                                                                                                                       |
|------------|---------------------------------------------------------------------------------------------------------------------------------------|
| Definition | Compared to the mandibular ramus, hyperintense marrow signalling within the condyle on post-contrast T1-weighted fat-saturated images |
| Grading    | Absent<br>Present                                                                                                                     |

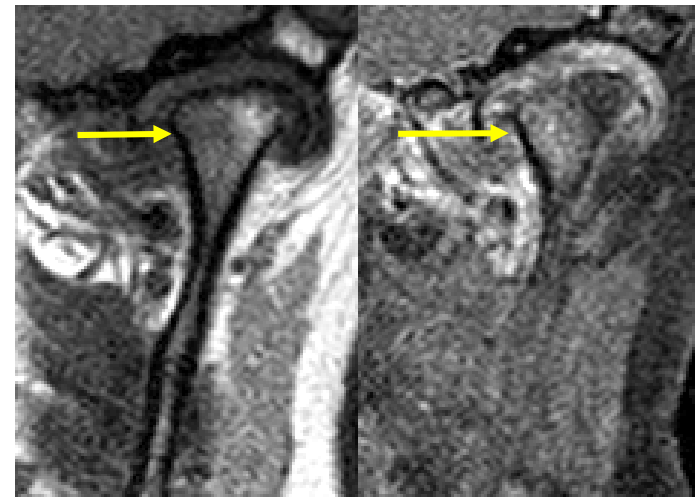

Hypointense signal on pre-contrast T1-weighted image (left) shows higher signal intensity than adjacent marrow on post-contrast T1-weighted fat-saturated image (right)

Absent

Cor T1

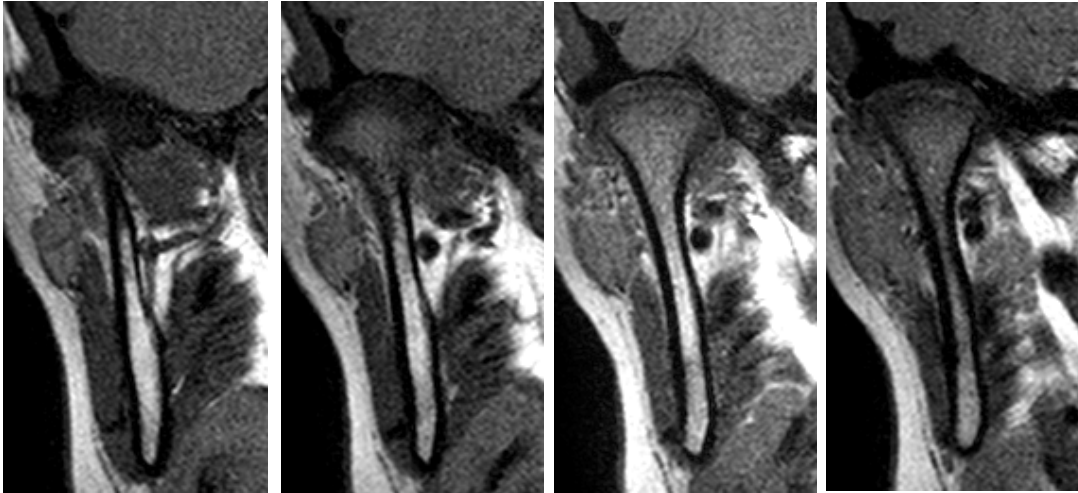

Ax T1 fs Gd

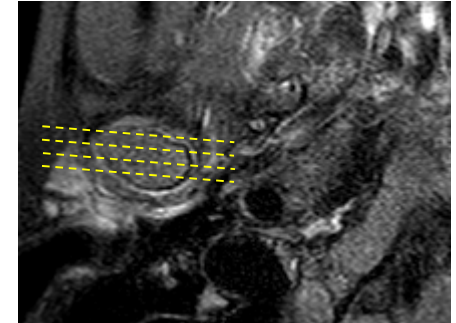

Cor T1 fs Gd

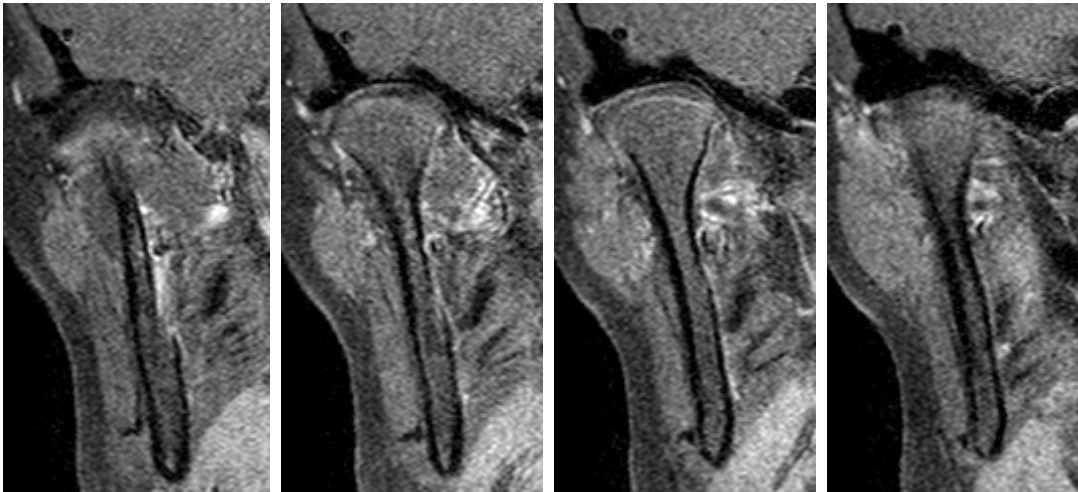

Right TMJ of a 12-year-old boy

## Present

Cor T1

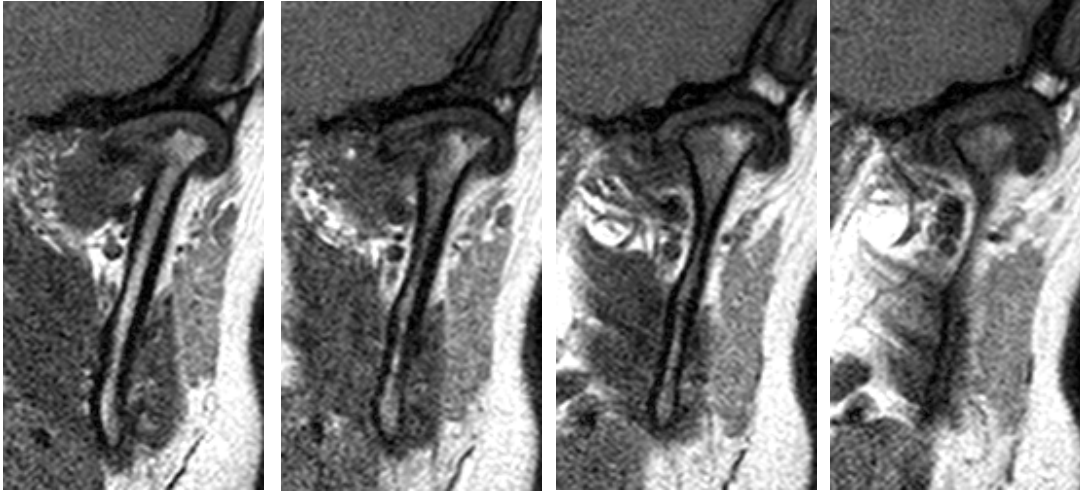

Ax T1 fs Gd

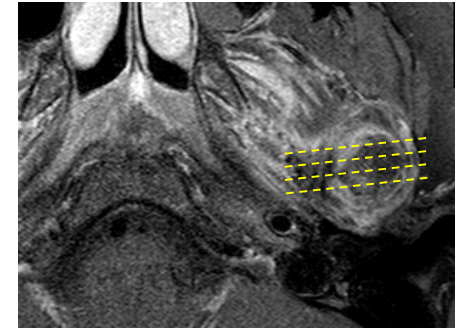

Cor T1 fs Gd

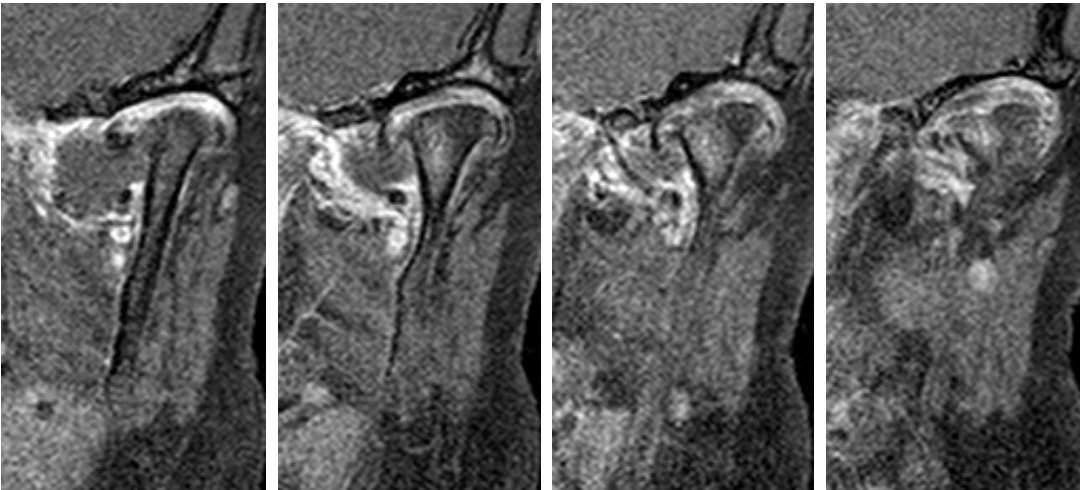

A 12-year-old boy with a known history of JIA

|            |                                                                                                                                   |
|------------|-----------------------------------------------------------------------------------------------------------------------------------|
| Definition | Increased joint fluid with isointense signalling of joint space compared to that of cerebrospinal fluid on fluid-sensitive images |
| Grading    | Absent:<br>≤1mm fluid in joint recess                                                                                             |
|            | Small:<br>>1 and ≤2mm fluid in recess or involving entire joint compartment                                                       |
|            | Large:<br>>2mm fluid in recess or involving entire joint compartment                                                              |

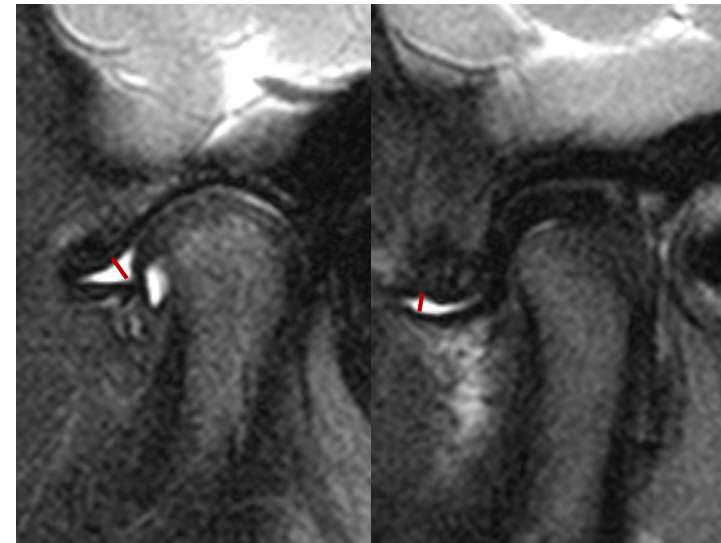

Measuring joint effusion in the largest joint recess on sagittal-oblique T2-weighted fat-saturated image

# Inflammatory Domain

## Differentiation between Effusion and Synovium

Sag-obl T2 fs

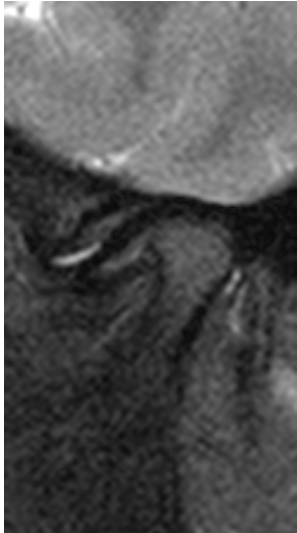

Left TMJ of a 12-year-old girl

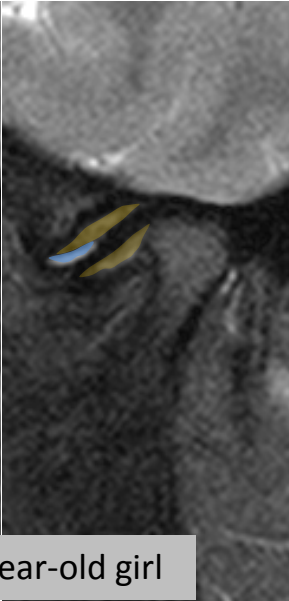

Sag-obl T1 fs Gd

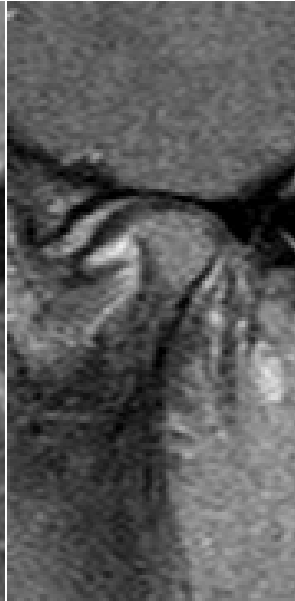

Sag-obl T2 fs

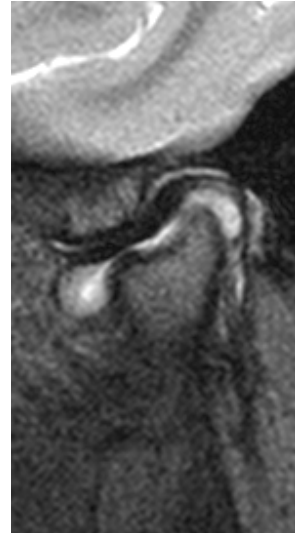

Left TMJ of a 10-year-old girl

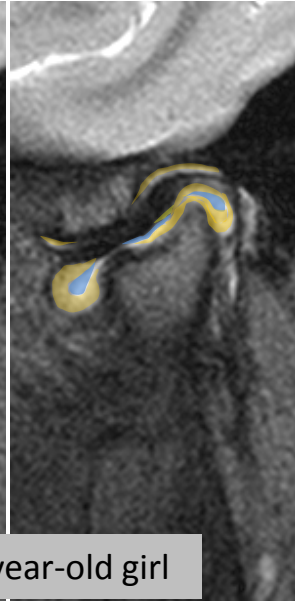

Sag-obl T1 fs Gd

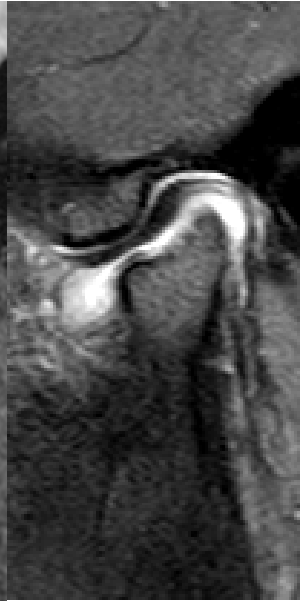

### Synovial fluid

Intraarticular isointense signal structure on T2-weighted fat-saturated image compared to signal of CSF, which may enhance after contrast administration

### Synovium

Intermediate signal intensity structure on T2-weighted fat-saturated image, which enhances after contrast administration

Sag-obl T2 fs

Cor T1

Absent

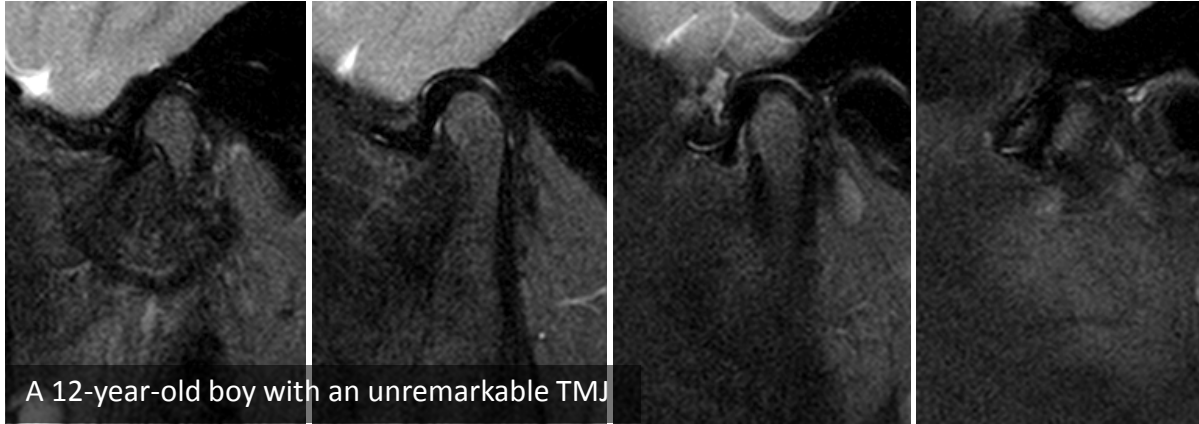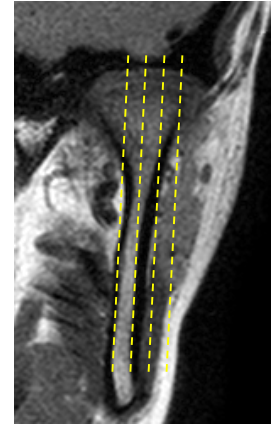

Mild

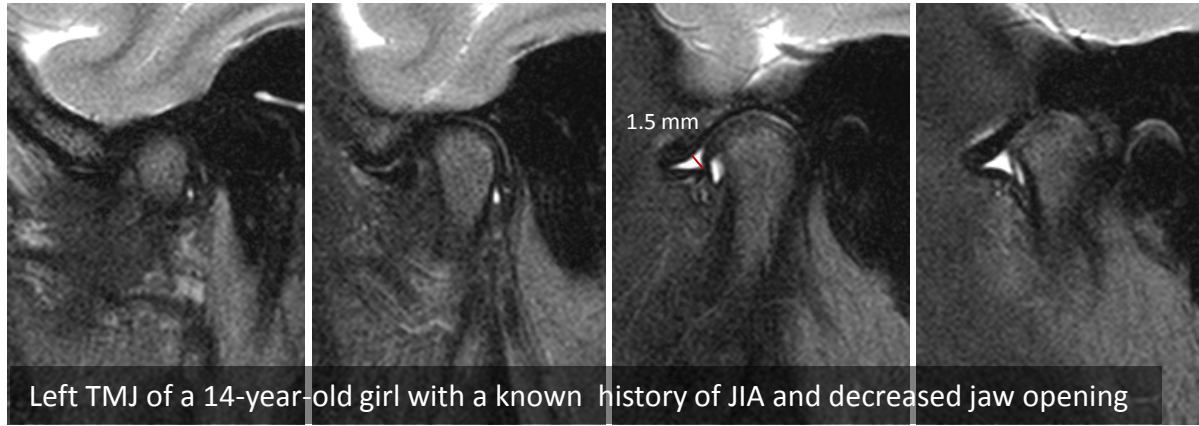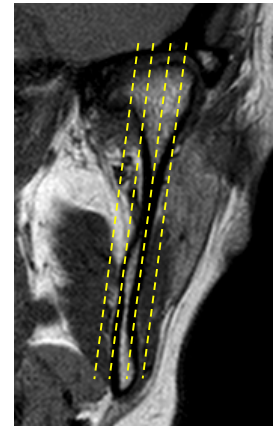

Moderate/  
Severe

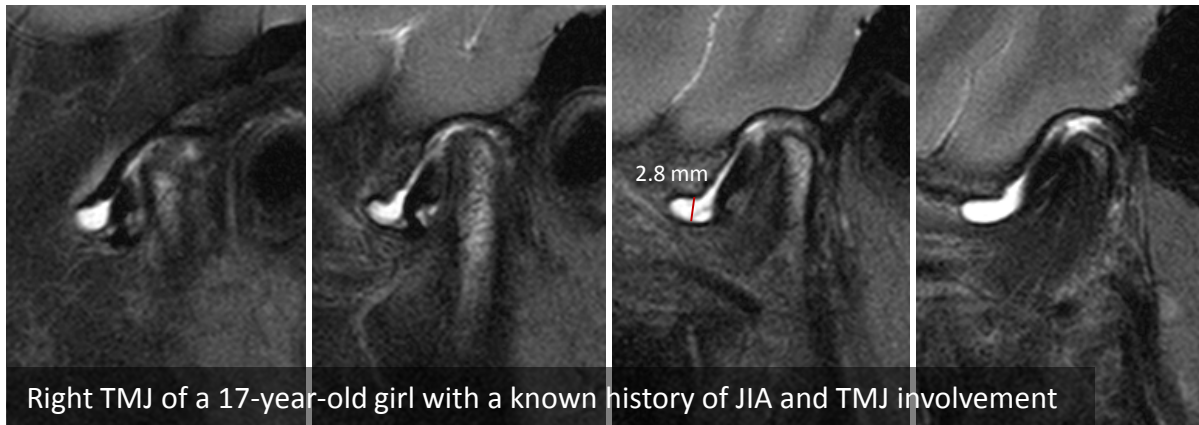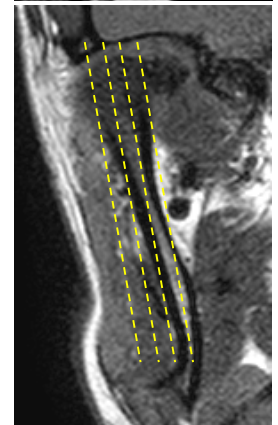

# Inflammatory Domain

## Joint Enhancement

|            |                                                                                                                                         |
|------------|-----------------------------------------------------------------------------------------------------------------------------------------|
| Definition | Signal intensity of the synovium, capsule, and joint fluid higher than that of muscle on post-contrast T1-weighted fat-saturated images |
| Grading    | Normal:<br>High signal intensity confined to signal perimeter of normal fluid on corresponding fluid-sensitive image                    |
|            | Mild:<br>High signal intensity exceeding signal perimeter of normal fluid on corresponding fluid-sensitive image                        |
|            | Moderate/Severe:<br>High signal intensity diffusely involving one or both joint compartments                                            |

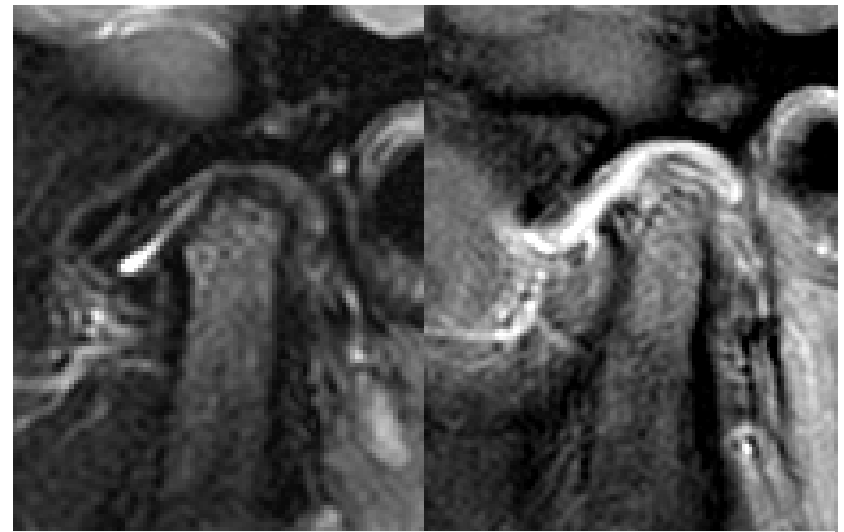

Sagittal T2-weighted fat-saturated (left) and post-contrast T1-weighted fat-saturated (right) images demonstrate joint enhancement



Normal

Sag-obl T2 fs

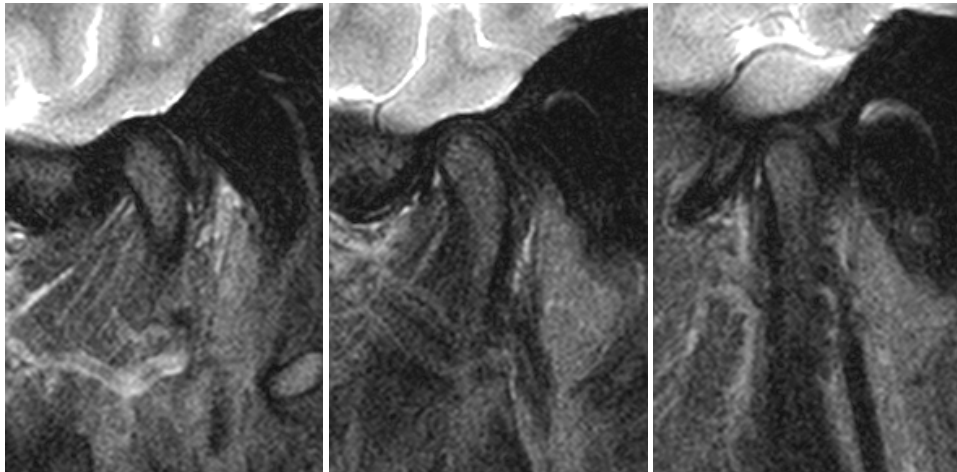

Cor T1

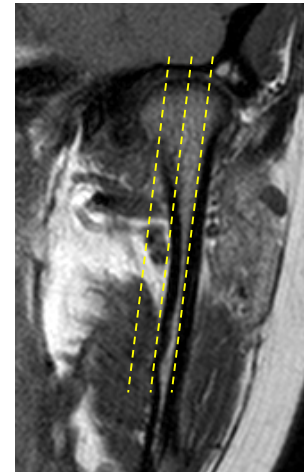

Sag-obl T1 fs Gd

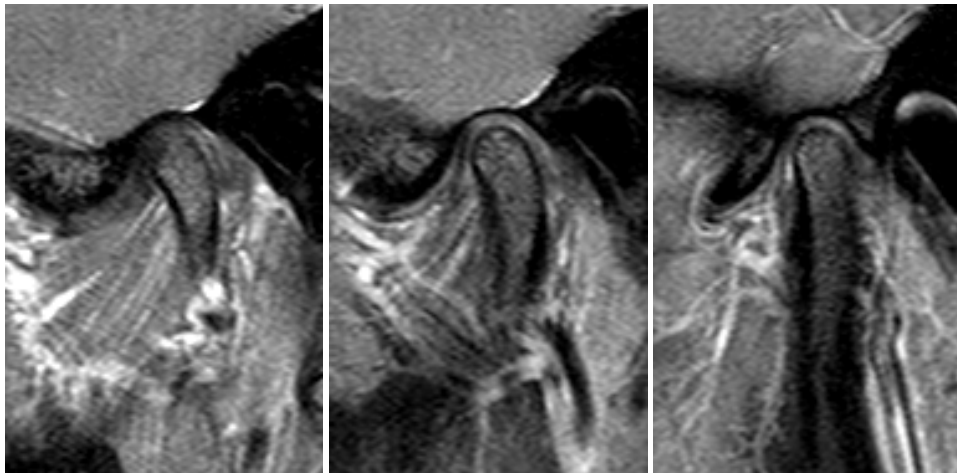

Cor T1 fs Gd

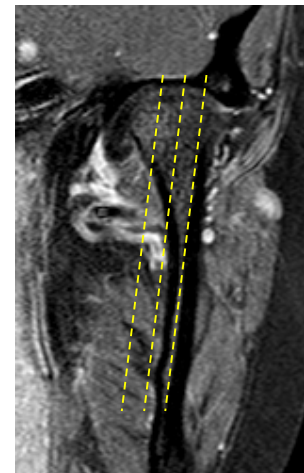

An unremarkable TMJ of a 16-year-old girl presented with knee pain and right jaw click with pain

Mild

Sag-obl T2 fs

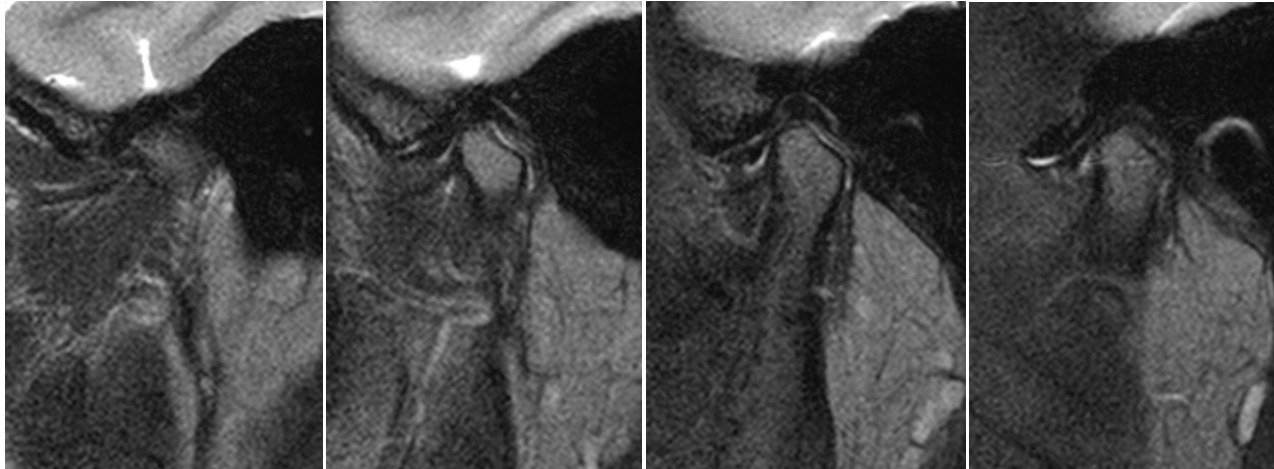

Cor T1

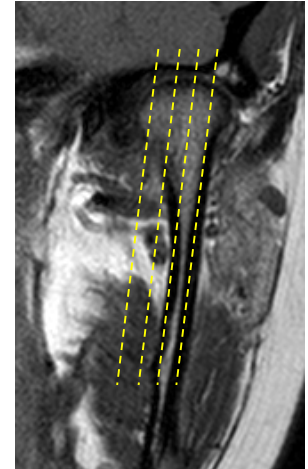

Sag-obl T1 fs Gd

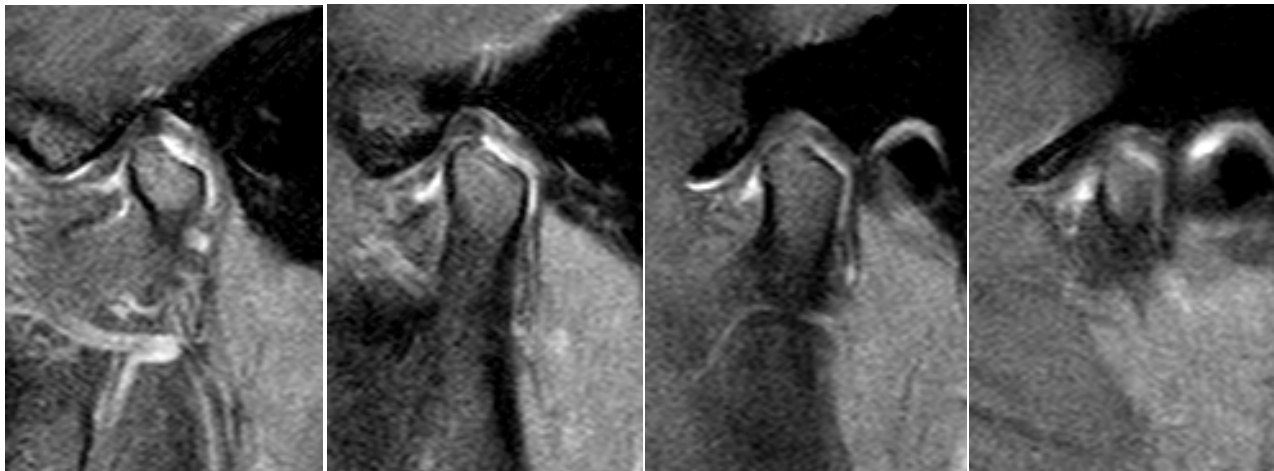

Cor T1 fs Gd

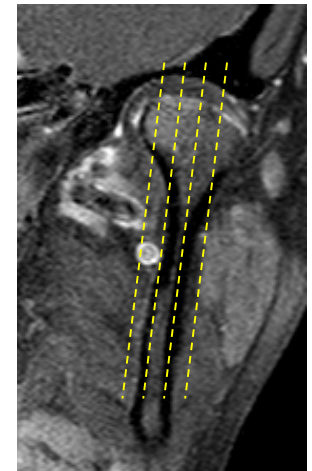

Left TMJ of a 17-year-old girl with a known history of JIA

Sag-obl T2 fs

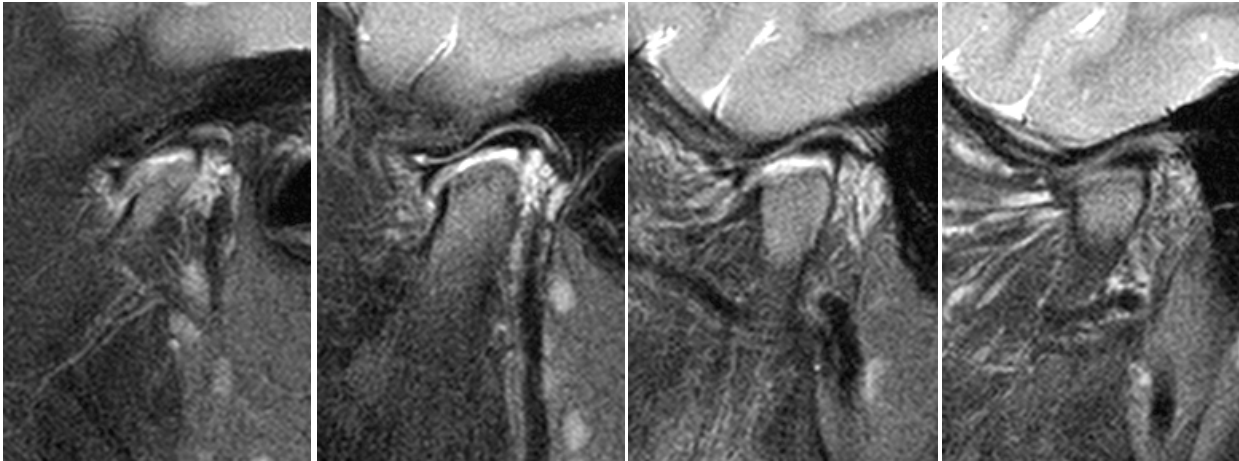

Cor T1

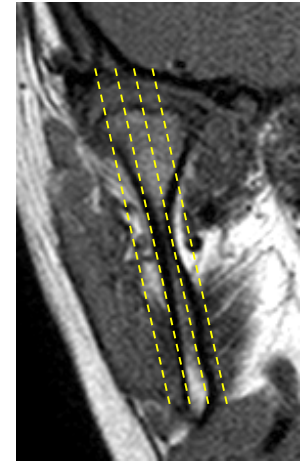

Sag-obl T1 fs Gd

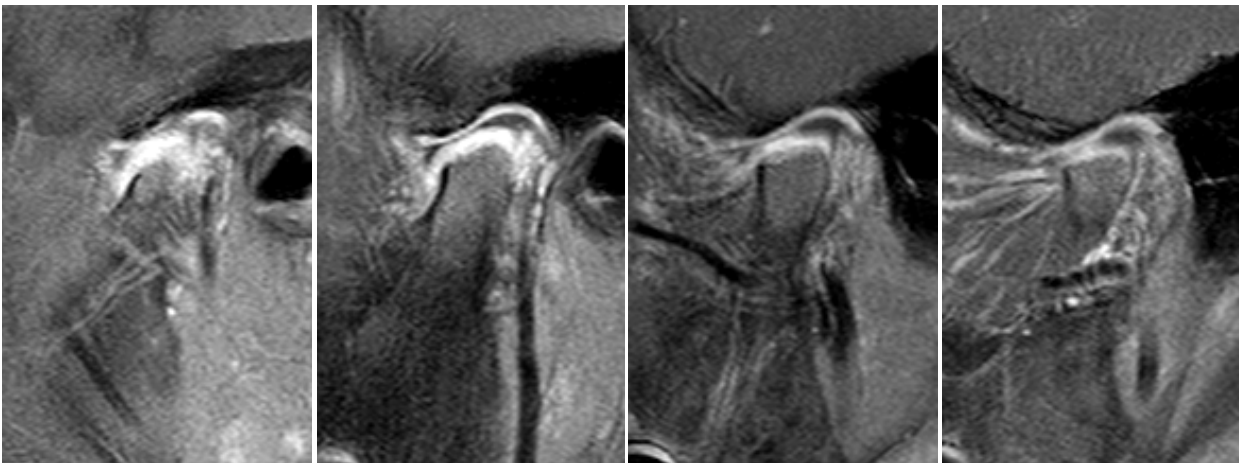

Cor T1 fs Gd

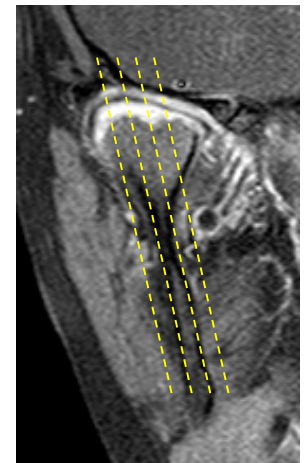

Moderate/  
Severe

Right TMJ of a 7-year-old boy with a known history of JIA

# Inflammatory Domain

## Synovial Thickening

|            |                                                                                                                  |
|------------|------------------------------------------------------------------------------------------------------------------|
| Definition | Thickened synovial lining of the joint compartments with intermediate signal intensity on fluid-sensitive images |
| Grading    | Absent:<br>No synovium visible (apparent joint space $\leq 1$ mm width)                                          |
|            | Mild:<br>>1 and $\leq 2$ mm thickness at the point of maximum synovial thickening                                |
|            | Moderate/Severe:<br>>2mm thickness at the point of maximum synovial thickening                                   |

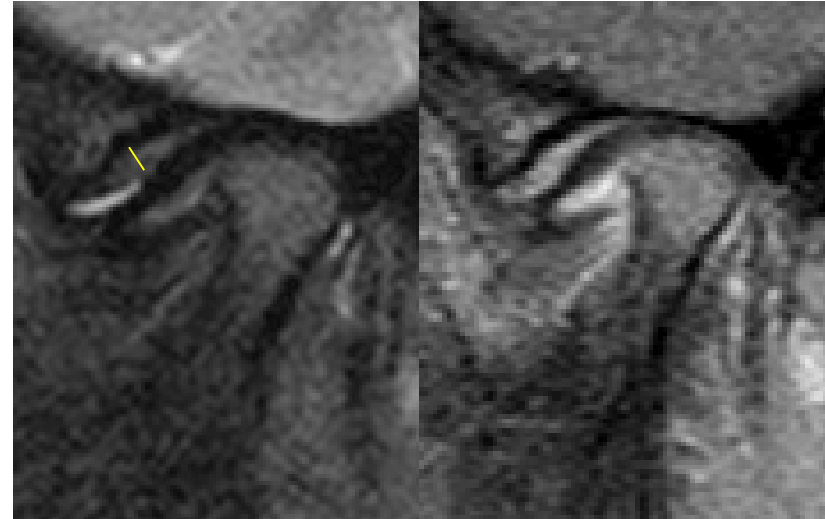

Maximal thickness of synovium is measured on sag-obl T2 fs (left) which enhances on sag-obl T1 fs Gd (right)

Absent

Sag-obl T2 fs

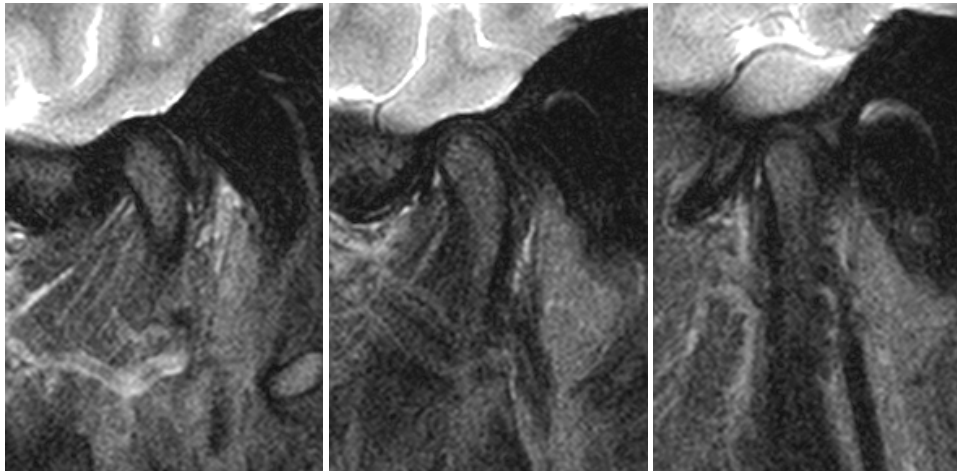

Cor T1

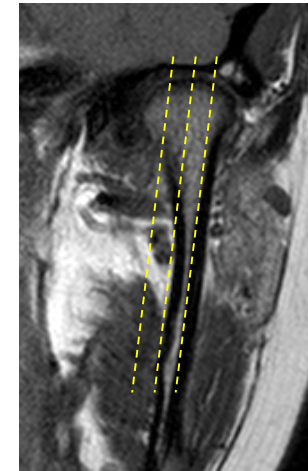

Sag-obl T1 fs Gd

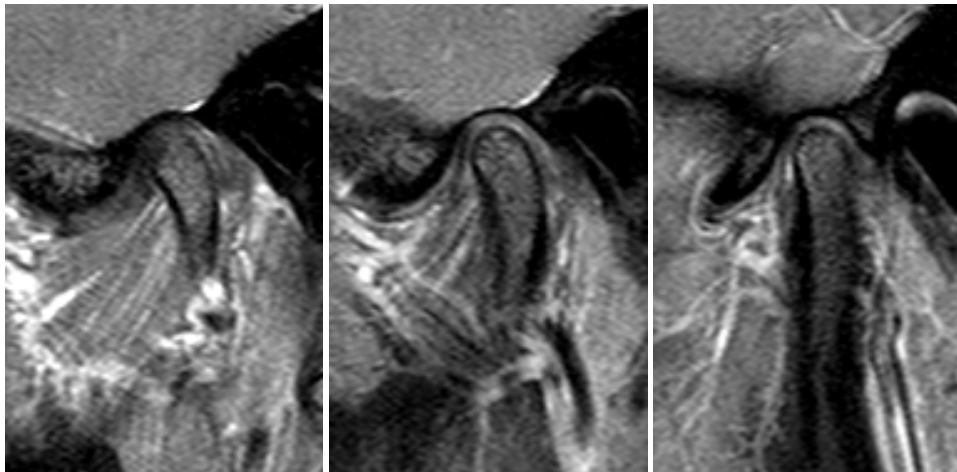

Cor T1 fs Gd

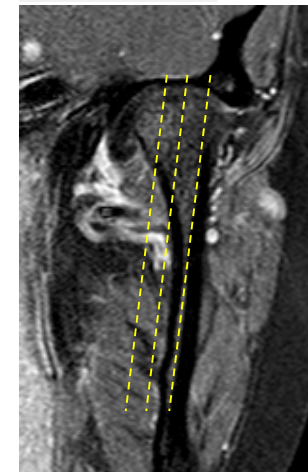

An unremarkable TMJ of a 16-year-old girl who presented with knee pain and right jaw click with pain

Mild

Sag-obl T2 fs

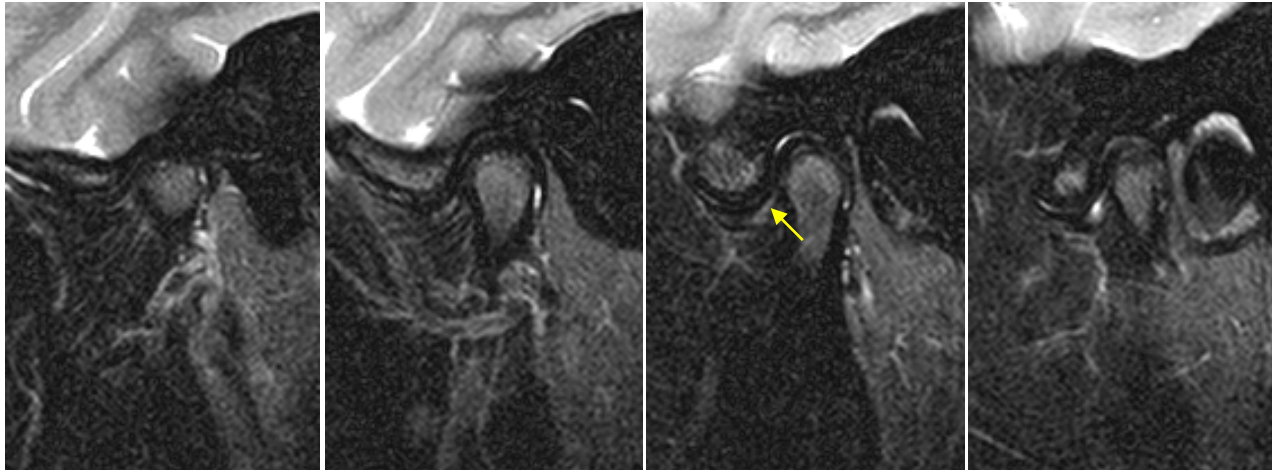

Cor T1

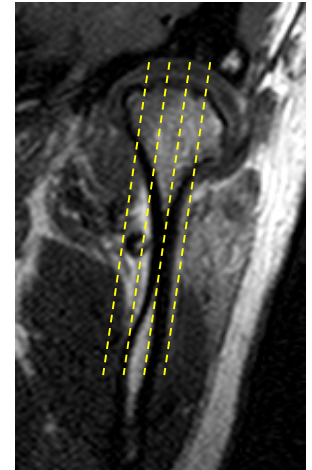

Sag-obl T1 fs Gd

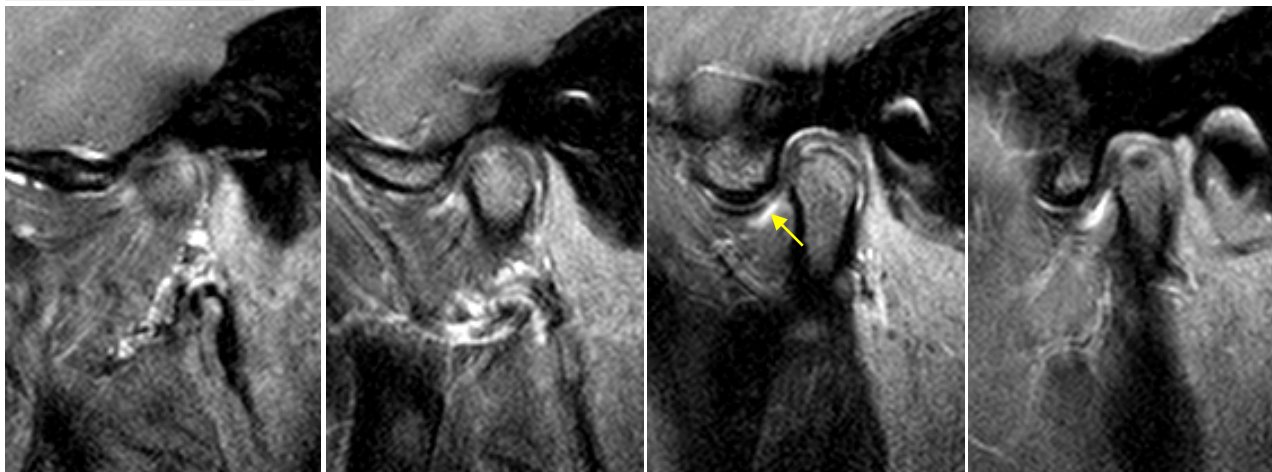

Cor T1 fs Gd

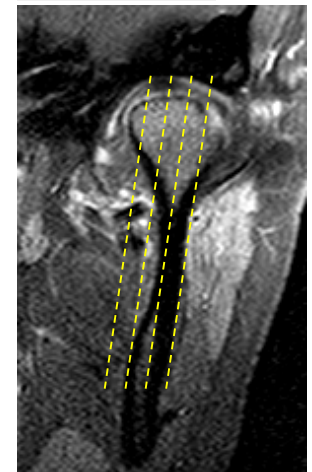

Left TMJ of a 16-year-old girl with a known history of extended oligoarticular JIA and TMJ involvement

Sag-obl T2 fs

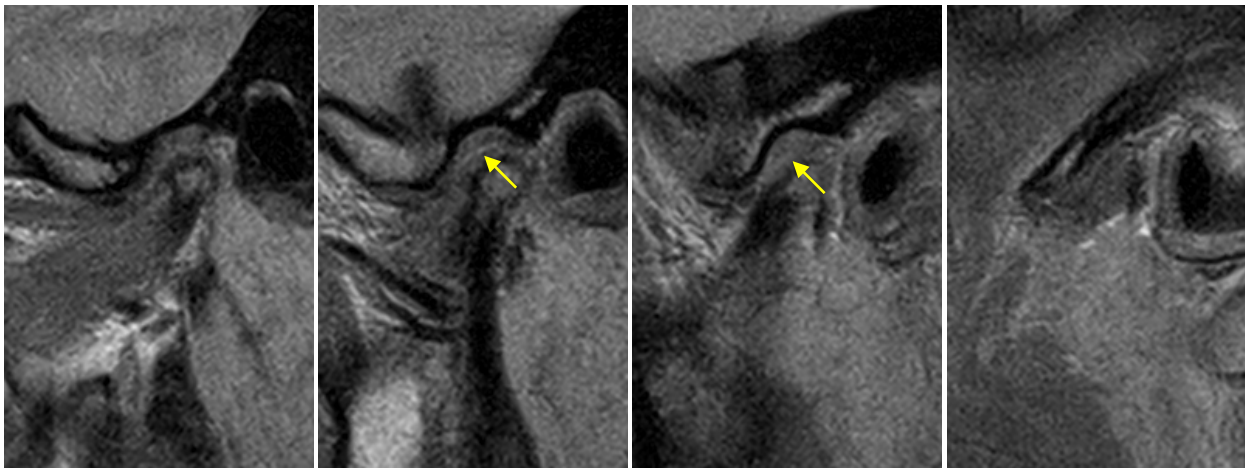

Cor T1

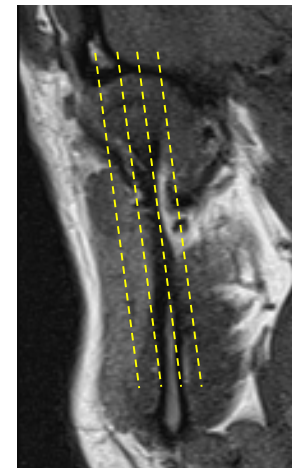

Sag-obl T1 fs Gd

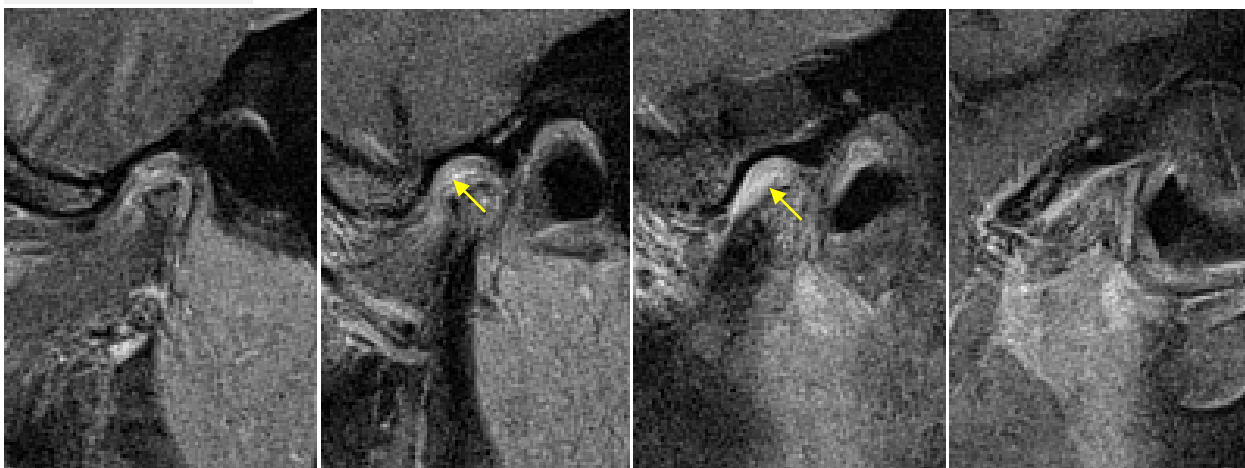

Cor T1 fs Gd

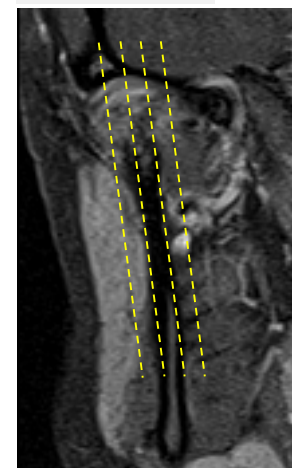

Moderate/  
Severe

A 16-year-old girl with a known history of oligoarticular JIA with right TMJ arthritis

# Damage Domain

## Condylar Flattening

|            |                                                                                                                                                                                                                                                                        |
|------------|------------------------------------------------------------------------------------------------------------------------------------------------------------------------------------------------------------------------------------------------------------------------|
| Definition | Loss of the round or slightly angular shape of the condylar head, viewed in the sagittal-oblique plane                                                                                                                                                                 |
| Grading    | <p>Absent:<br/>Normal round/slightly angular shape</p> <p>Mild:<br/>Extent of flattening involves part of the surface of the condyle</p> <p>Moderate/Severe:<br/>Extent of flattening involves the entire surface of the condyle, or loss of height of the condyle</p> |

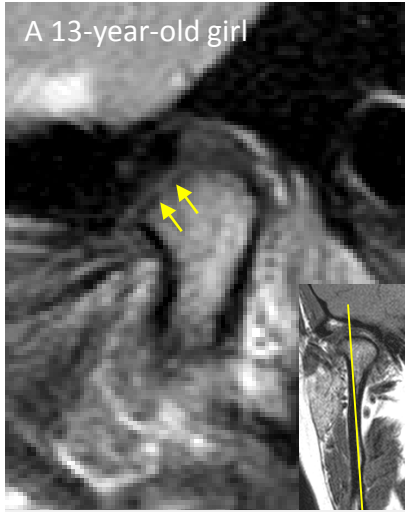

Sag-obl PD image shows loss of the rounded shaped of the condyle

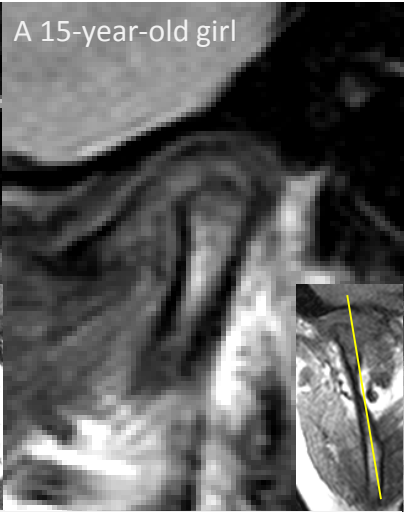

Sag-obl PD image shows hypoplastic condyle with flattened anterior surface



Sag-obl PD

Cor T1

Absent

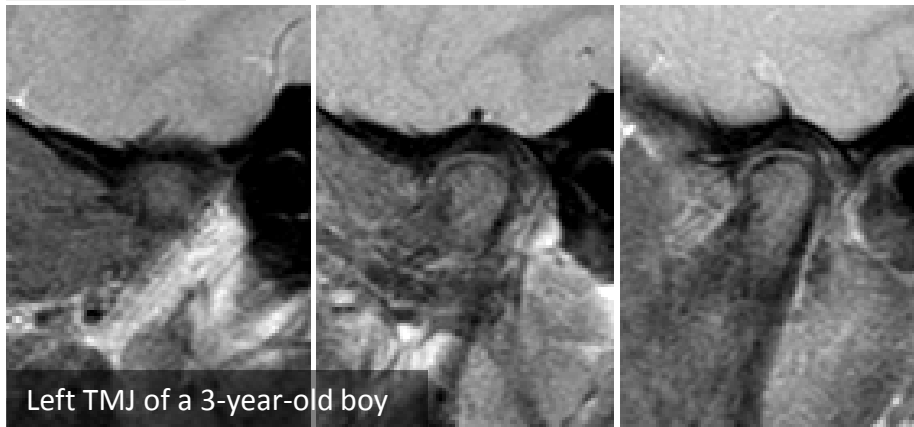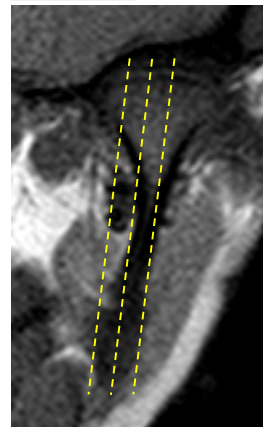

Mild

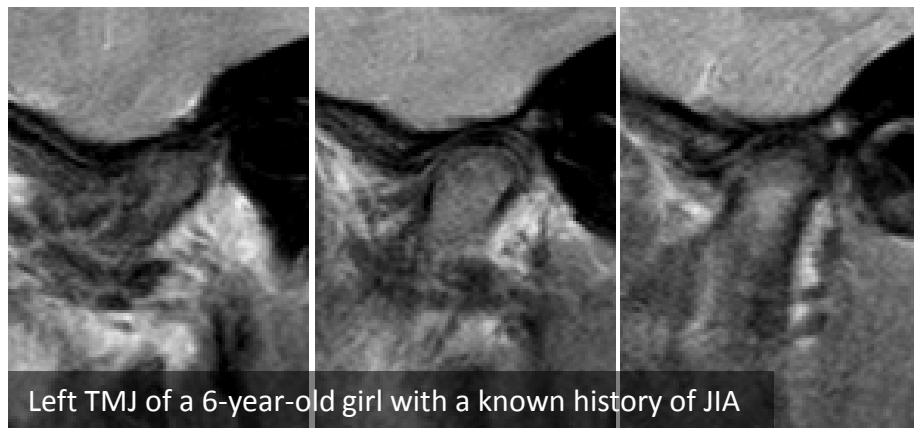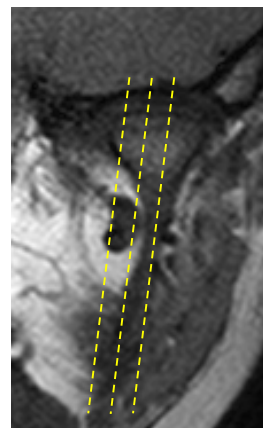

Moderate/  
Severe

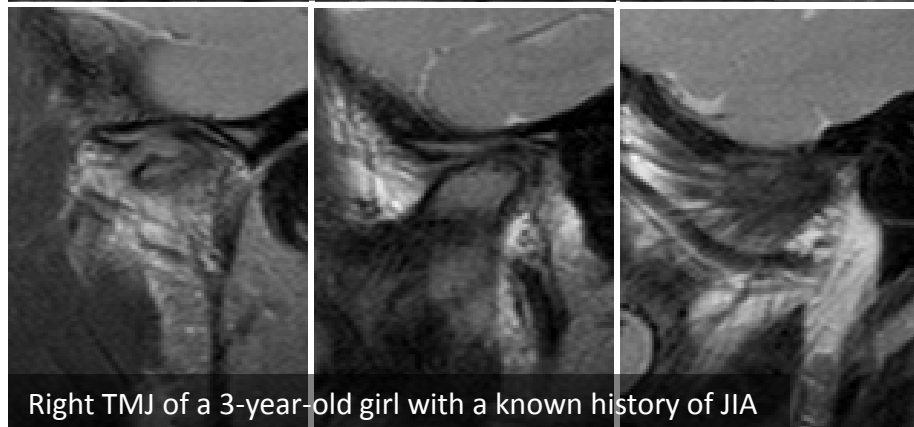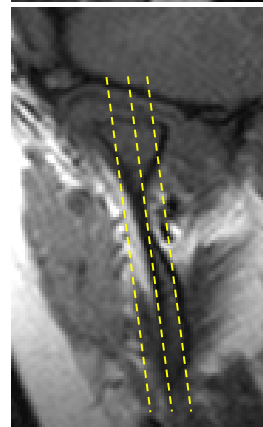

Sag-obl PD

Cor T1

Normal

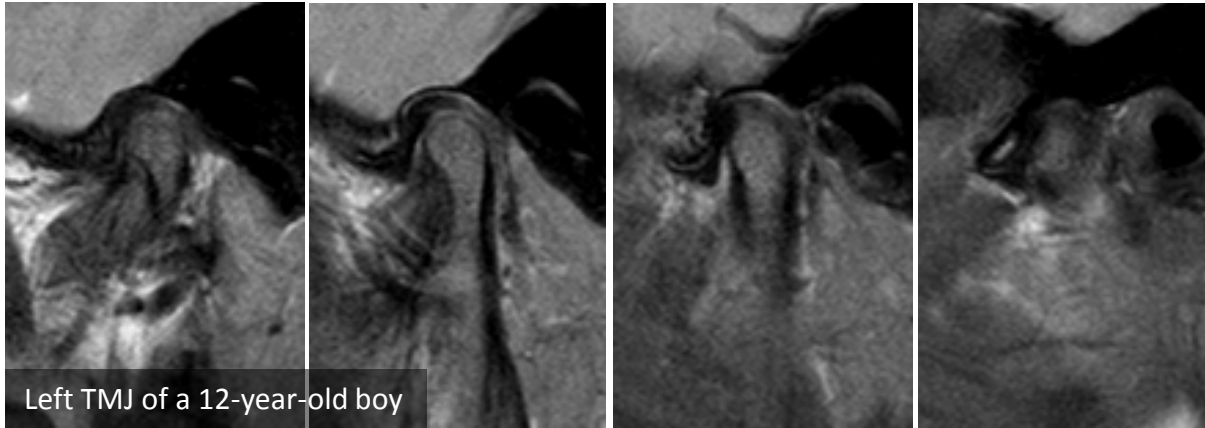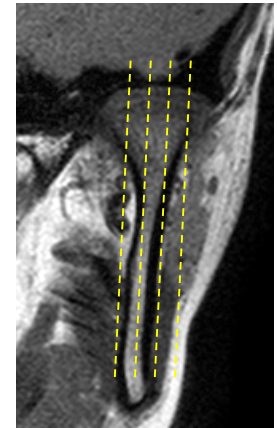

Mild

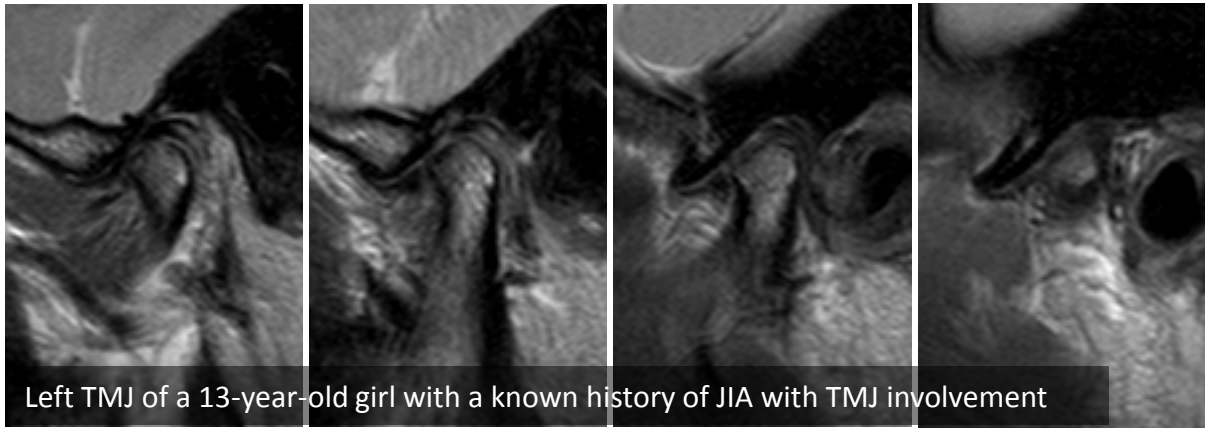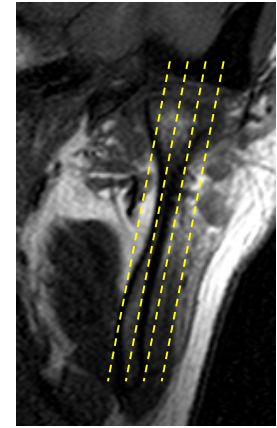

Moderate/  
Severe

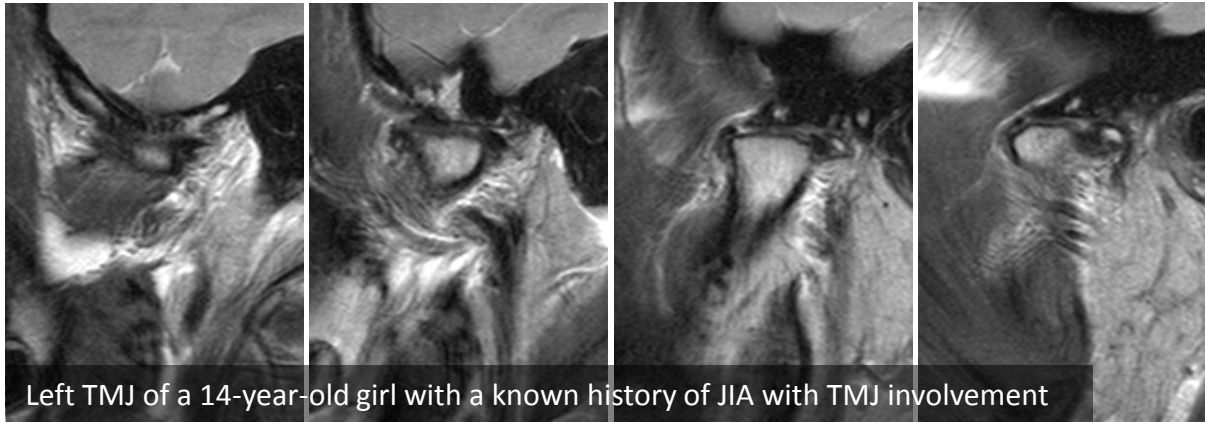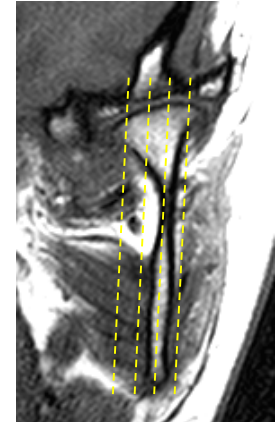

Sag-obl PD

Cor T1

Normal

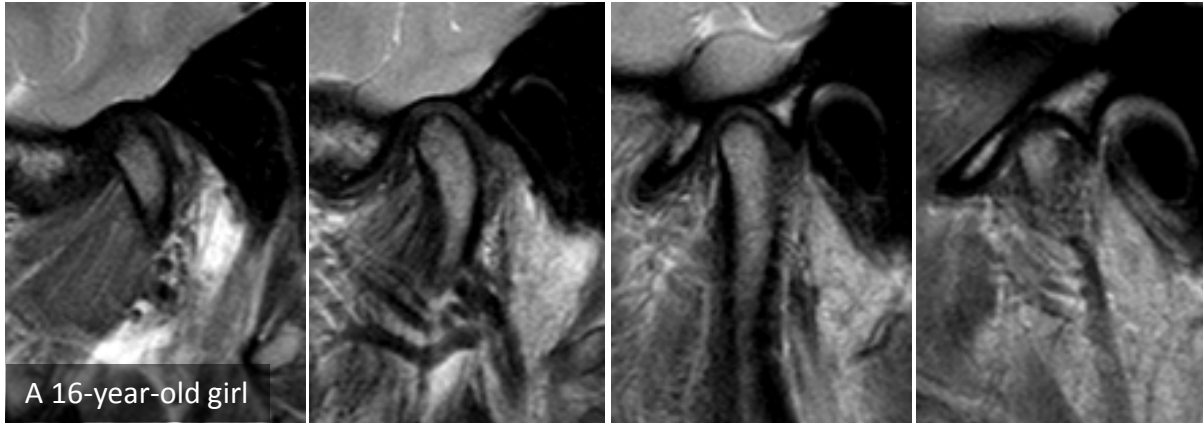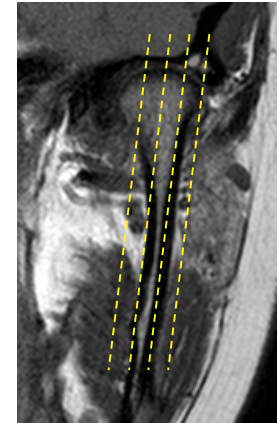

Mild

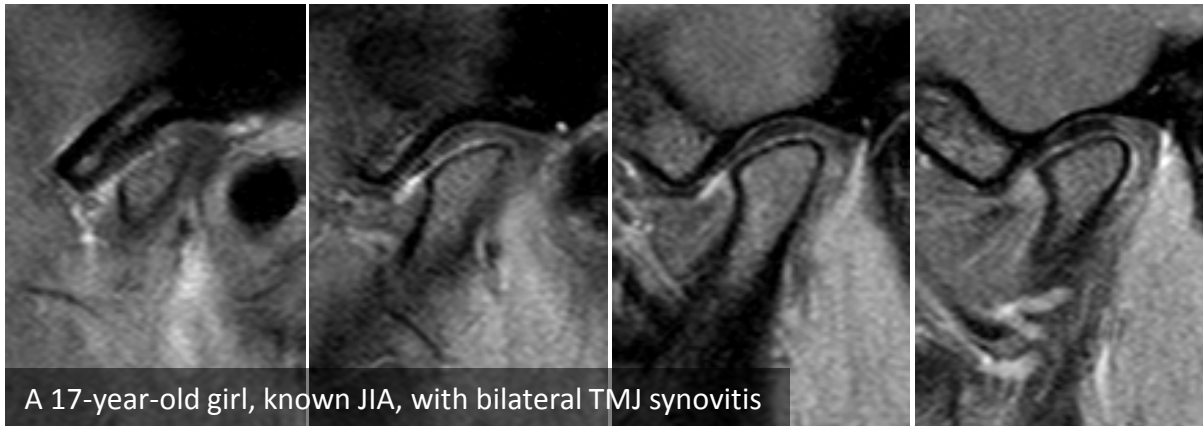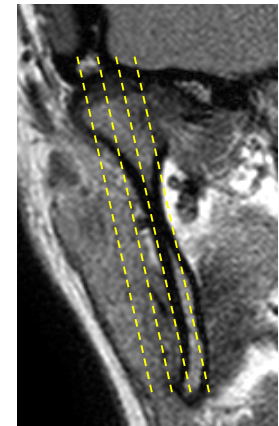

Moderate/  
Severe

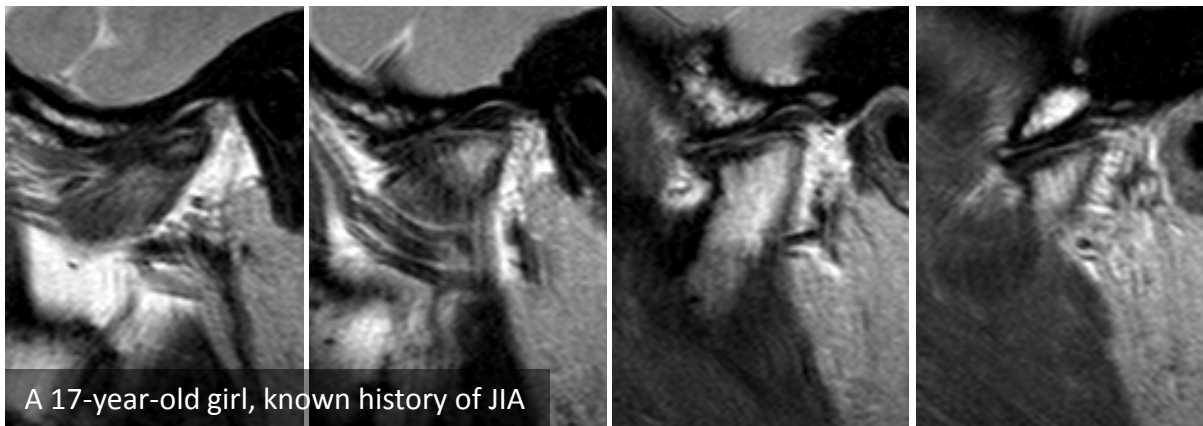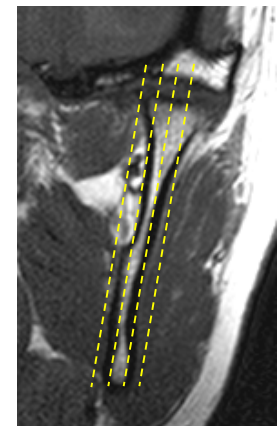

# Damage Domain

## Erosions

|            |                                                                                                                                                                                                                                                                                                                         |
|------------|-------------------------------------------------------------------------------------------------------------------------------------------------------------------------------------------------------------------------------------------------------------------------------------------------------------------------|
| Definition | Any irregularity or break of the bony joint surfaces leading to the loss of the smooth continuous outline of the bone                                                                                                                                                                                                   |
| Grading    | <p>Absent: No irregularities or deep breaks</p> <p>Mild: Presence of irregularities involving only part of the articular surface of the condyle</p> <p>Moderate/Severe: Presence of deep breaks in the subchondral bone seen in two planes, or irregularities involving the entire articular surface of the condyle</p> |

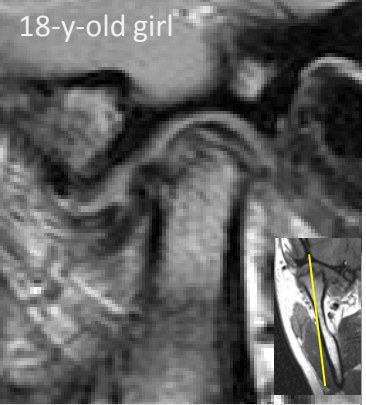

18-y-old girl  
Sagittal PD-weighted image shows breaks of joint surface

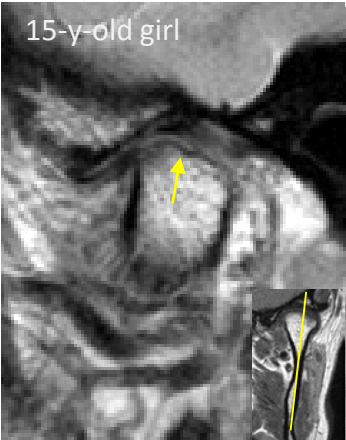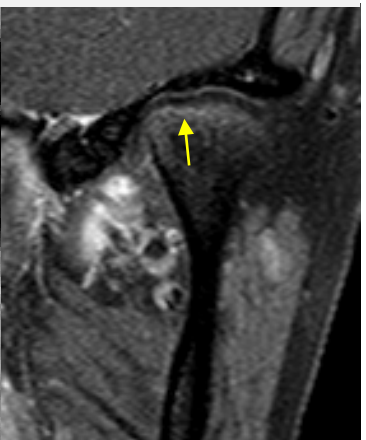

15-y-old girl  
Sagittal PD-weighted (left) and post-contrast coronal T1-weighted fat-saturated (right) images show surface irregularity

Sag-obl PD

Cor T1

Absent

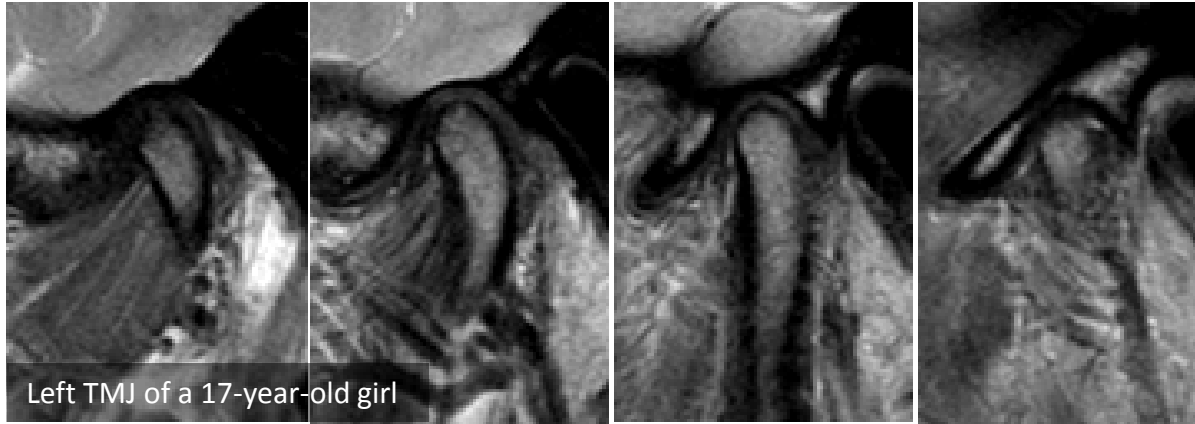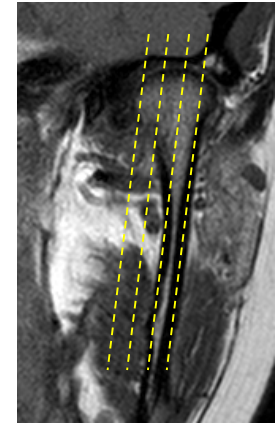

Mild

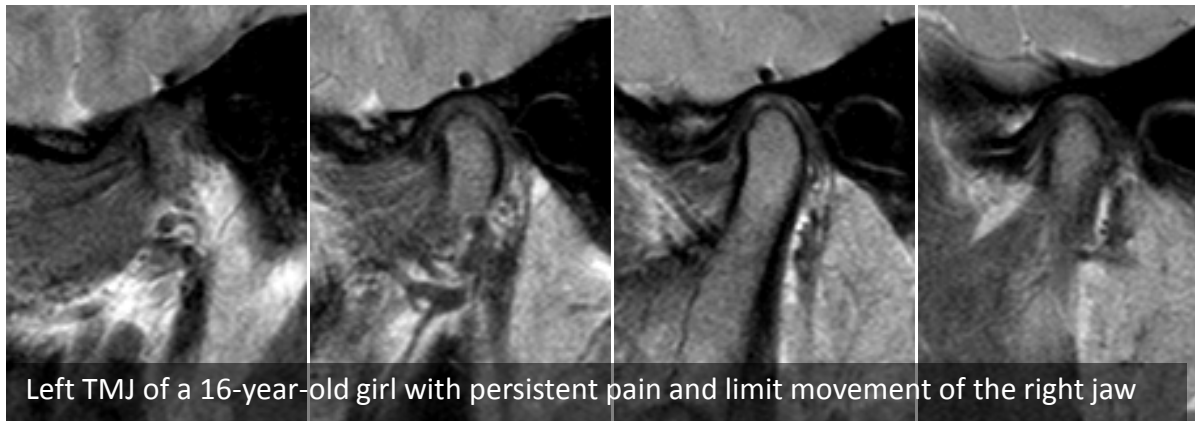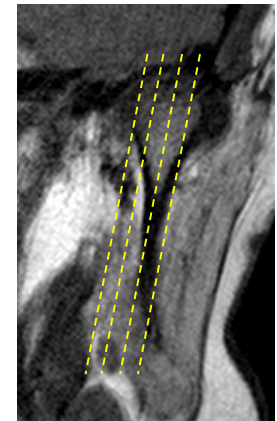

Moderate/  
Severe

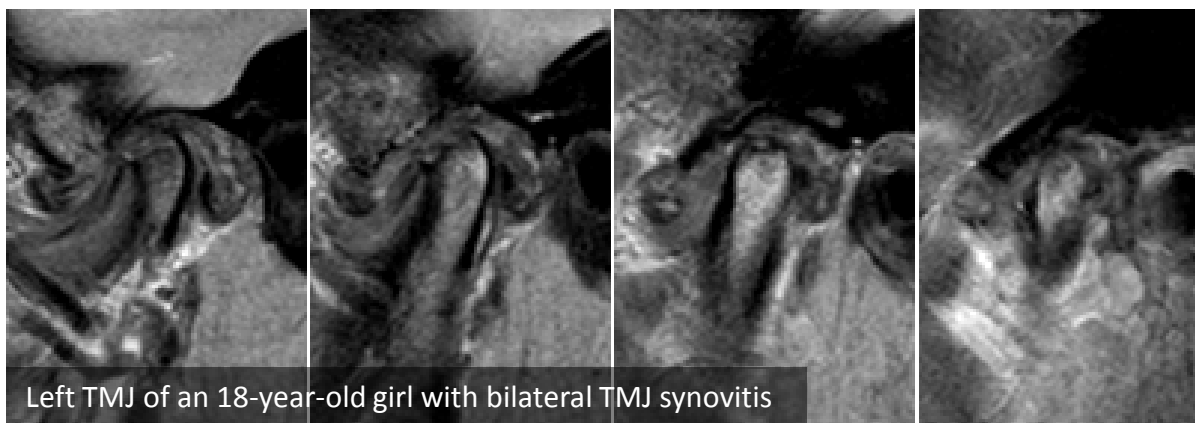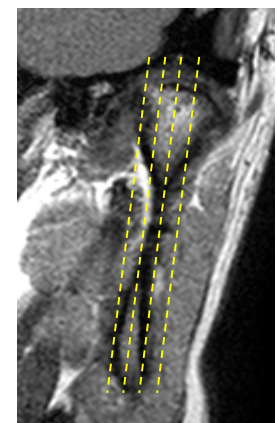

# Damage Domain

## Disk Abnormalities

|            |                                                                                          |
|------------|------------------------------------------------------------------------------------------|
| Definition | Any abnormality of the articular disk, including flattening, displacement or destruction |
| Grading    | Absent                                                                                   |
|            | Present                                                                                  |

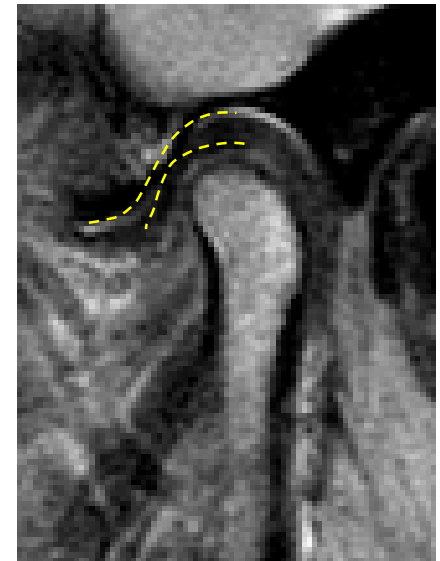

Sagittal-oblique PD-weighted image shows normal intraarticular disk

Sag-obl PD

Cor T1

Dislocation

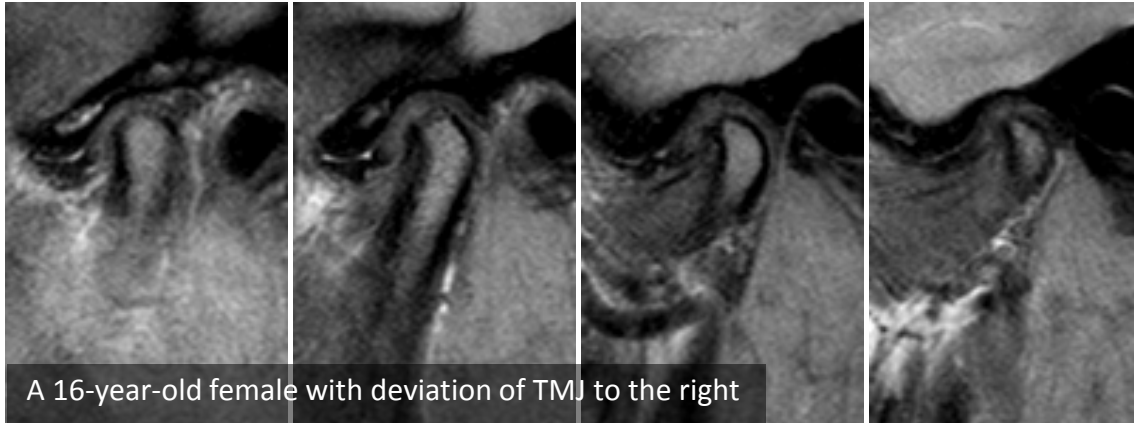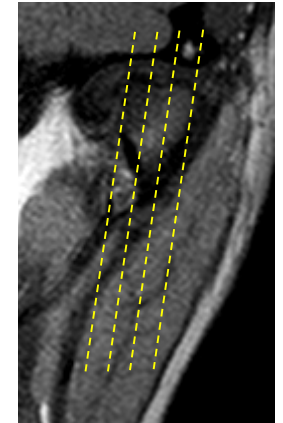

Thinning

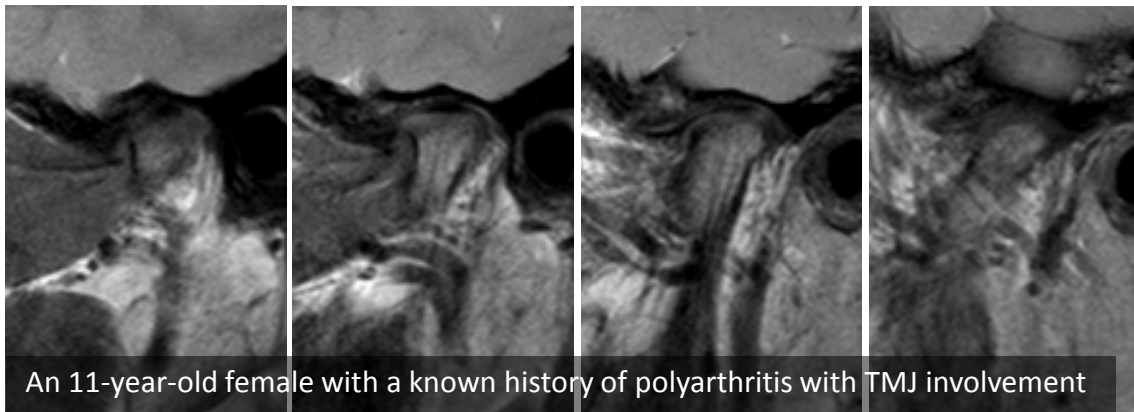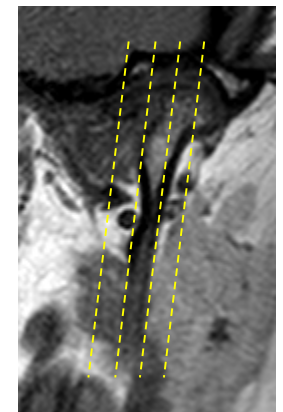

Destruction

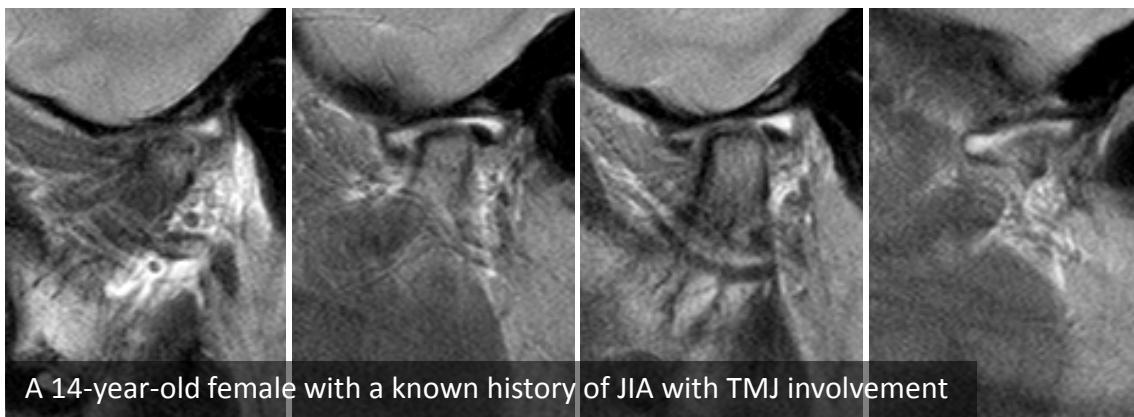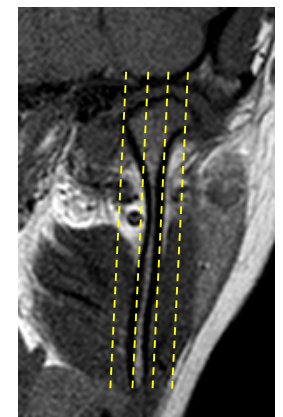

# Abbreviations in the Imaging Atlas

- Abbreviations:

|                |                                                             |
|----------------|-------------------------------------------------------------|
| <i>CSF</i>     | Cerebrospinal Fluid                                         |
| <i>JIA</i>     | Juvenile Idiopathic Arthritis                               |
| <i>MRI</i>     | Magnetic Resonance Imaging                                  |
| <i>OMERACT</i> | Outcome Measures in Rheumatic Arthritis and Clinical Trials |
| <i>TMJ</i>     | Temporomandibular Joint                                     |
| <i>y</i>       | years                                                       |

- MRI sequences:

|           |                         |
|-----------|-------------------------|
| <i>T1</i> | T1-weighted             |
| <i>T2</i> | T2-weighted             |
| <i>PD</i> | Proton density weighted |
| <i>fs</i> | fat-saturated           |
| <i>Gd</i> | Gadolinium enhanced     |

- Imaging planes:

|                |                  |
|----------------|------------------|
| <i>Sag-obl</i> | Sagittal-oblique |
| <i>Cor</i>     | Coronal          |
| <i>Cor-obl</i> | Coronal-oblique  |
