# Supplementary material for: Temporomandibular joint atlas for detection and grading of juvenile idiopathic arthritis involvement by magnetic resonance imaging
Source: PubMed Central journal article supplement (PMC5823950; doi:10.1007/s00247-017-4000-0), 2017-11-13
Supplement: 247_2017_4000_MOESM2_ESM.pdf [file 247_2017_4000_MOESM2_ESM.pdf]

## Imaging parameters for temporomandibular joint MRI

Online Resource 2 to pictorial essay “Temporomandibular Joint Atlas for Detection and Grading of Juvenile Idiopathic Arthritis Involvement by Magnetic Resonance Imaging”, Pediatric Radiology.

Christian J. Kellenberger, Thitiporn Junhasavasdikul, Mirkamal Tolend, Andrea S. Doria

Corresponding Author: Christian J. Kellenberger, Department of Diagnostic Imaging, University Children’s Hospital Zürich, christian.kellenberger@kispi.uzh.ch

Protocol from the University Children’s Hospital Zürich for 1.5 Tesla (Discovery MR450, GE Healthcare), obtained with dual ring TMJ coil

|                                            | Pre-contrast     |                  |                                 | Post-contrast                   |                                 | Bone evaluation  |
|--------------------------------------------|------------------|------------------|---------------------------------|---------------------------------|---------------------------------|------------------|
|                                            | PD-weighted      | T1-weighted      | T2-weighted with fat saturation | T1-weighted with fat saturation | T1-weighted with fat saturation | PD-weighted      |
| Image weighting                            | PD-weighted      | T1-weighted      | T2-weighted with fat saturation | T1-weighted with fat saturation | T1-weighted with fat saturation | PD-weighted      |
| Imaging plane                              | Sagittal-oblique | Sagittal-oblique | Sagittal-oblique                | Sagittal-oblique                | Coronal                         | Sagittal-oblique |
| MRI sequence                               | FSE              | 2D FSPGR         | FSE                             | FSE                             | FSE                             | 3D FSPGR         |
| Flip angle                                 | 90°              | 80°              | 90°                             | 90°                             | 90°                             | 20°              |
| Repetition time [ms]                       | 3000             | 300              | 5400                            | 670                             | 500                             | 10               |
| Echo time [ms]                             | 13               | 4.2              | 77                              | 10                              | 10                              | 4.2              |
| Echo train length                          | 8                | na               | 16                              | 4                               | 4                               | na               |
| Field of view [mm]                         | 120              | 120              | 120                             | 120                             | 220                             | 100              |
| Slice thickness / interslice distance [mm] | 2/0              | 2/0              | 2/0                             | 2/0                             | 3/0                             | 2/-1             |
| Matrix                                     | 256 x 224        | 384 x 224        | 256 x 224                       | 256 x 192                       | 256 x 192                       | 256 x 192        |
| Signal averages [n]                        | 3                | 3                | 3                               | 3                               | 3                               | 3                |
| Images [n]                                 | 12 for each TMJ  | 12 for each TMJ  | 12 for each TMJ                 | 12 for each TMJ                 | 12                              | 28 for each TMJ  |

2D two dimensional, 3D three dimensional, FSE fast spin echo, FSPGR fast spoiled gradient echo, na not applicable, PD proton density, TMJ temporomandibular joint

Protocol from the Hospital for Sick Children Toronto for 3 Tesla (Philips Achieva), obtained with 32-channel head coil

|                      | Pre-contrast  |                  |                  | Post-contrast    |               |               |
|----------------------|---------------|------------------|------------------|------------------|---------------|---------------|
|                      | T1 TSE        | T2 TSE FS        | PD TSE           | T1 TSE FS        | T1 TSE FS     | T1 TSE FS     |
| Sequences            | T1 TSE        | T2 TSE FS        | PD TSE           | T1 TSE FS        | T1 TSE FS     | T1 TSE FS     |
| Plane                | Coronal       | Sagittal-oblique | Sagittal-oblique | Sagittal-oblique | Coronal       | Axial         |
| TE [ms]              | 21            | 80               | 30               | 20               | 20            | 20            |
| TR [ms]              | 600           | 4000             | 2000             | 600              | 600           | 600           |
| Flip angle [°]       | 90            | 90               | 90               | 90               | 90            | 90            |
| FOV (mm x mm)        | 140 x 140     | 110 x 110        | 110 x 110        | 110 x 110        | 140 x 140     | 140 x 140     |
| Acquisition matrix   | 280 x 280     | 288 x 280        | 276 x 241        | 276 x 219        | 348 x 279     | 280 x 230     |
| Pixel spacing        | 0.292 x 0.292 | 0.196 x 0.196    | 0.344 x 0.344    | 0.286 x 0.286    | 0.312 x 0.312 | 0.312 x 0.312 |
| Slice thickness (mm) | 2             | 3                | 3                | 3                | 2             | 3             |
| # of averages        | 2             | 3                | 2                | 1                | 1             | 1             |
| Slice spacing (mm)   | 2.2           | 3.3              | 3.3              | 3.3              | 2.2           | 2.2           |
| Echo train length    | 4             | 15               | 7                | 3                | 3             | 3             |
| Pixel bandwidth      | 291           | 210              | 282              | 291              | 291           | 291           |

T1 T1-weighted, T2 T2-weighted, PD proton density, TSE turbo spin echo, TE echo time, TR repetition time, FOV field of view
